# Supplementary material for: Prevalence and outcomes of twin pregnancies in Botswana: a national birth outcomes surveillance study
Source: PubMed Central journal article supplement — BMJ Open. 2021 Oct 21;11(10):e047553. doi: 10.1136/bmjopen-2020-047553 (PMC8532549; doi:10.1136/bmjopen-2020-047553), 2021-10-21
Supplement: bmjopen-2020-047553.draft_revisions.pdf [file bmjopen-2020-047553.draft_revisions.pdf]

# BMJ Open

BMJ Open is committed to open peer review. As part of this commitment we make the peer review history of every article we publish publicly available.

When an article is published we post the peer reviewers' comments and the authors' responses online. We also post the versions of the paper that were used during peer review. These are the versions that the peer review comments apply to.

The versions of the paper that follow are the versions that were submitted during the peer review process. They are not the versions of record or the final published versions. They should not be cited or distributed as the published version of this manuscript.

BMJ Open is an open access journal and the full, final, typeset and author-corrected version of record of the manuscript is available on our site with no access controls, subscription charges or pay-per-view fees (<http://bmjopen.bmj.com>).

If you have any questions on BMJ Open's open peer review process please email [info.bmjopen@bmj.com](mailto:info.bmjopen@bmj.com)

# BMJ Open

## Prevalence and Outcomes of Twin Pregnancies in Botswana: a National Birth Outcomes Surveillance Study

|                               |                                                                                                                                                                                                                                                                                                                                                                                                                                                                                                                                                                                                                                                                                                                                                                                                                                                                                                                                 |
|-------------------------------|---------------------------------------------------------------------------------------------------------------------------------------------------------------------------------------------------------------------------------------------------------------------------------------------------------------------------------------------------------------------------------------------------------------------------------------------------------------------------------------------------------------------------------------------------------------------------------------------------------------------------------------------------------------------------------------------------------------------------------------------------------------------------------------------------------------------------------------------------------------------------------------------------------------------------------|
| Journal:                      | <i>BMJ Open</i>                                                                                                                                                                                                                                                                                                                                                                                                                                                                                                                                                                                                                                                                                                                                                                                                                                                                                                                 |
| Manuscript ID                 | bmjopen-2020-047553                                                                                                                                                                                                                                                                                                                                                                                                                                                                                                                                                                                                                                                                                                                                                                                                                                                                                                             |
| Article Type:                 | Original research                                                                                                                                                                                                                                                                                                                                                                                                                                                                                                                                                                                                                                                                                                                                                                                                                                                                                                               |
| Date Submitted by the Author: | 08-Dec-2020                                                                                                                                                                                                                                                                                                                                                                                                                                                                                                                                                                                                                                                                                                                                                                                                                                                                                                                     |
| Complete List of Authors:     | Isaacson, Arielle; Harvard Medical School; Botswana-Harvard AIDS Institute Partnership<br>Diseko, Modiegi; Botswana-Harvard AIDS Institute Partnership<br>Mayondi, Gloria; Botswana-Harvard AIDS Institute Partnership<br>Mabuta, Judith; Botswana-Harvard AIDS Institute Partnership<br>Davey, Sonya; Brigham and Women's Hospital; Botswana-Harvard AIDS Institute Partnership<br>Mmalane, Mompoti; Botswana-Harvard AIDS Institute Partnership<br>Makhema, Joseph; Botswana-Harvard AIDS Institute Partnership<br>Jacobson, DL; Harvard University T H Chan School of Public Health, Biostats<br>Lockett, Rebecca; Beth Israel Deaconess Medical Center; Botswana-Harvard AIDS Institute Partnership<br>Shapiro, Roger; Botswana-Harvard AIDS Institute Partnership; Harvard University T H Chan School of Public Health<br>Zash, Rebecca; Beth Israel Deaconess Medical Center; Botswana-Harvard AIDS Institute Partnership |
| Keywords:                     | Community child health < PAEDIATRICS, Prenatal diagnosis < OBSTETRICS, Fetal medicine < OBSTETRICS, PUBLIC HEALTH                                                                                                                                                                                                                                                                                                                                                                                                                                                                                                                                                                                                                                                                                                                                                                                                               |
|                               |                                                                                                                                                                                                                                                                                                                                                                                                                                                                                                                                                                                                                                                                                                                                                                                                                                                                                                                                 |

SCHOLARONE™  
Manuscripts

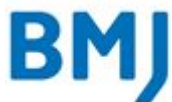

I, the Submitting Author has the right to grant and does grant on behalf of all authors of the Work (as defined in the below author licence), an exclusive licence and/or a non-exclusive licence for contributions from authors who are: i) UK Crown employees; ii) where BMJ has agreed a CC-BY licence shall apply, and/or iii) in accordance with the terms applicable for US Federal Government officers or employees acting as part of their official duties; on a worldwide, perpetual, irrevocable, royalty-free basis to BMJ Publishing Group Ltd ("BMJ") its licensees and where the relevant Journal is co-owned by BMJ to the co-owners of the Journal, to publish the Work in this journal and any other BMJ products and to exploit all rights, as set out in our [licence](#).

The Submitting Author accepts and understands that any supply made under these terms is made by BMJ to the Submitting Author unless you are acting as an employee on behalf of your employer or a postgraduate student of an affiliated institution which is paying any applicable article publishing charge ("APC") for Open Access articles. Where the Submitting Author wishes to make the Work available on an Open Access basis (and intends to pay the relevant APC), the terms of reuse of such Open Access shall be governed by a Creative Commons licence – details of these licences and which [Creative Commons](#) licence will apply to this Work are set out in our licence referred to above.

Other than as permitted in any relevant BMJ Author's Self Archiving Policies, I confirm this Work has not been accepted for publication elsewhere, is not being considered for publication elsewhere and does not duplicate material already published. I confirm all authors consent to publication of this Work and authorise the granting of this licence.

1  
2  
3 **Title:** Prevalence and Outcomes of Twin Pregnancies in Botswana:  
4 a National Birth Outcomes Surveillance Study  
5

6  
7 **Authors:** Arielle Isaacson<sup>1</sup>, Modiegi D. Diseko<sup>2</sup>, Gloria K. Mayondi<sup>2</sup>, Judith Mabuta<sup>2</sup>, Sonya  
8 Davey<sup>2,6</sup>, Mompoti Mmalane<sup>2</sup>, Joseph Makhema<sup>2</sup>, DL Jacobson,<sup>5</sup> Rebecca Lockett,<sup>2,3</sup> Roger L.  
9 Shapiro,<sup>2,3,4</sup> Rebecca Zash<sup>2,3,4</sup>  
10

11  
12 **Affiliations:**

13 <sup>1</sup>Harvard Medical School, Boston MA, USA

14 <sup>2</sup>Botswana Harvard AIDS Institute Partnership, Gaborone, Botswana

15 <sup>3</sup>Beth Israel Deaconess Medical Center, Boston, MA, USA

16 <sup>4</sup>Harvard T.H. Chan School of Public Health, Boston, MA, USA

17 <sup>5</sup>Center for Biostatistics in AIDS Research, Harvard T.H. Chan School of Public Health, Boston,  
18 Massachusetts, USA

19 <sup>6</sup>Brigham and Women's Hospital, Boston, MA, USA  
20  
21  
22  
23  
24

25 Corresponding Author: Arielle Isaacson

26 Email: [arielleisaacson@hms.harvard.edu](mailto:arielleisaacson@hms.harvard.edu)

27 Postal Address: 48 Solomon Pierce Road, Lexington, MA 02420  
28  
29  
30

31 Word Count: 2464  
32  
33  
34  
35  
36  
37  
38  
39  
40  
41  
42  
43  
44  
45  
46  
47  
48  
49  
50  
51  
52  
53  
54

55 ABSTRACT  
56  
57  
58  
59  
60

1  
2  
3 **Objectives:** This study aims to evaluate the prevalence and  
4 outcome of twin pregnancies in Botswana.  
5

6 **Setting:** The Tsepamo Study conducted birth outcomes surveillance  
7 at 8 government-run hospitals (~45% of all births in Botswana)  
8 from August 2014-June 2018 and expanded to 18 hospitals (~70% of  
9 all births in Botswana) from July 2018-March 2019.  
10  
11

12 **Participants:** Data were collected for all live-born and  
13 stillborn in-hospital deliveries with a gestational age (GA)  
14 greater than 24 weeks. This analysis included 117,593 singleton  
15 and 3,718 twin infants born to 119,477 women between August  
16 2014-March 2019 and excluded 73 higher order multiples (23 sets  
17 of triplets and 1 set of quadruplets).  
18  
19

20 **Outcomes Measured:** Our primary outcomes were preterm delivery  
21 (<37 weeks GA), very preterm delivery (<32 weeks GA) and  
22 stillbirth (APGAR score of 0,0,0).  
23  
24

25 **Results:** Between August 2014 and March 2019, 119,477 deliveries  
26 were recorded, including 1859 (1.6%) sets of twins. Women with  
27 twin pregnancies had a similar median number of antenatal care  
28 visits (9 vs. 10), but were more likely to deliver in a tertiary  
29 center (54.8% vs. 45.1%,  $p<0.001$ ) and more likely to have a C-  
30 section (54.6% vs. 22.0%,  $p<0.001$ ) than women with singletons.  
31 Compared with singletons, twin pregnancies had a higher risk of  
32 preterm delivery (<37 weeks GA) (47.6% vs. 16.7%, aRR 2.8, 95%  
33 CI 2.7, 2.9) and very preterm delivery (<32 weeks) (11.8% vs.  
34 4.0%, aRR 3.0 95% CI 2.6, 3.4). Among all twin pregnancies, 128  
35 (6.9%) had at least one stillborn infant compared with 2845  
36 (2.4%) stillbirths among singletons (aRR 2.8, 95% CI 2.3, 3.3).  
37  
38

39 **Conclusion:**

40 Adverse birth outcomes are common among twins in Botswana, and  
41 are often severe. Interventions that allow for earlier  
42 identification of twin gestation and improved antenatal  
43 management of twin pregnancies may improve infant and child  
44 survival.  
45  
46  
47  
48  
49  
50  
51  
52

53 **Keywords:** Twins, multiple gestation, Botswana, sub-Saharan  
54 Africa, stillbirth, preterm, low-birthweight  
55  
56  
57  
58  
59  
60

### Strengths and limitations of this study

- Our study uses a large, nationally representative sample with little missing data.
- Due to the limited availability of early prenatal ultrasound, gestational age may be less accurate and we are unable to determine the cause of preterm birth or whether preterm birth is spontaneous.
- We are unable to evaluate the impact of preterm and low birthweight on longer-term outcomes of twins, or estimate perinatal mortality.

### Background

Twin pregnancies are universally considered to be 'high-risk'. Maternal complications including hypertensive disorders, anemia, post-partum hemorrhage, and maternal mortality, are more common among twin pregnancies than singleton pregnancies [1]. Twins are also more likely than singletons to be born preterm and to have restricted growth in-utero, thereby increasing their risk for intrauterine demise and neonatal mortality [2]. The majority of existing research on multigravid pregnancies and birth outcomes among twins is from high-resource settings [3]. In these settings, the perinatal mortality rate of twins is 3-7 times higher than that of singletons [4, 5] and up to 60% of twins are born preterm (before 37 weeks) [6, 7].

1  
2  
3 In most high resource settings, twin pregnancies are  
4 managed by routine prenatal monitoring and neonatal intensive  
5 care services, including early identification of twin  
6 pregnancies, serial antenatal ultrasound, referral to  
7 specialized centers, and prenatal counselling [8]. In lower  
8 resource settings data are limited, but twin pregnancies may be  
9 at particularly high risk for adverse birth outcomes because of  
10 the lack of routine intensive prenatal monitoring and neonatal  
11 intensive care services [1, 9]. Additionally, maternal outcomes  
12 with multigravid pregnancies may also be worse because of  
13 limitations in management of maternal conditions more common in  
14 twin pregnancies, such as post-partum hemorrhage and pre-  
15 eclampsia [3].

16  
17 In Southern Africa, where assisted reproductive technology  
18 is not commonly available, the incidence of naturally occurring  
19 twins is estimated to be high (12-18 per 1000 births) compared  
20 to other low- and middle-income countries (LMIC) in East Asia  
21 and Latin America where the incidence of twins is as low as 6-9  
22 per 1000 births [10]. This relatively large number of twins may  
23 contribute substantially to perinatal mortality in the region  
24 [11]. Increased prevalence of preterm delivery and low-birth  
25 weight among twins leads to increased risk of under-five  
26 mortality due to malnutrition, respiratory disorders,  
27 vulnerability to infection, and developmental delays [12, 13].

1  
2  
3 It is estimated that one in five twins born in sub-Saharan  
4 Africa dies before the age of five [11]. Prior studies of twins  
5 in sub-Saharan Africa pre-date implementation of the United  
6 Nations Sustainable Development Goals (SDG) in 2015 and do not  
7 evaluate specific birth outcomes. This study focuses on  
8 Botswana, a country with a rapidly growing economy, strong  
9 investment in healthcare, a national program to prevent maternal  
10 mortality [14, 15], and a large, nationally-representative birth  
11 outcomes surveillance study (Tsepamo). We aim to provide the  
12 first published data on the prevalence and outcome of twin  
13 pregnancies in Botswana.  
14  
15  
16  
17  
18  
19  
20  
21  
22  
23  
24  
25  
26  
27  
28  
29

## 30 **Methods**

### 31 *The Tsepamo Study*

32  
33 The Tsepamo Study is a birth outcomes surveillance study in  
34 Botswana, where >95% of women deliver in health care settings  
35 (not at home) [16]. Details of methodology have been previously  
36 published [17, 18]. In summary, deidentified information was  
37 abstracted from obstetric cards (antenatal care records used  
38 throughout the pregnancy) at the time of discharge from the  
39 postnatal ward from women who deliver live-born or stillborn  
40 infants at select government maternity hospitals in Botswana.  
41  
42 From August 2014–June 2018 data were collected from 8 sites  
43 across the country (~45% of births in Botswana) and from July  
44  
45  
46  
47  
48  
49  
50  
51  
52  
53  
54  
55  
56  
57  
58  
59  
60



1  
2  
3 2018–March 2019 data were collected from up to 18 sites (~72% of  
4  
5 births in Botswana).  
6  
7  
8  
9

10 At each site, data were collected for all in-hospital deliveries  
11  
12 with a gestational age greater than 24 weeks. Information  
13  
14 included maternal demographics, antenatal care visits,  
15  
16 ultrasound reports with date of ultrasound, HIV status, method  
17  
18 of delivery, and infant delivery characteristics (including the  
19  
20 number of infants delivered, gestational age (GA) at delivery,  
21  
22 birthweight, and vital status at birth and discharge).  
23  
24  
25  
26  
27

### 28 *Outcomes*

29  
30 The primary adverse outcomes assessed were stillbirth (APGAR  
31  
32 scores 0,0,0), preterm birth (<37 weeks gestation), very preterm  
33  
34 birth (<32 weeks gestation), low birthweight (LBW) (<2500g) and  
35  
36 very low birthweight (VLBW) (<1500g). While APGAR scores and  
37  
38 birthweights were recorded for each individual twin, neonatal  
39  
40 death status was only collected on the first twin and therefore  
41  
42 neonatal deaths in twins could not be analyzed. The gestational  
43  
44 age was documented by midwives at the time of delivery using the  
45  
46 estimated delivery date (EDD), which is calculated at the first  
47  
48 antenatal care visit based on the last reported menstrual period  
49  
50 and confirmed by ultrasound when available. If the last  
51  
52 menstrual period was unknown or suspected to be incorrect, and  
53  
54  
55  
56  
57  
58  
59  
60

1  
2  
3 if no ultrasound data was available, midwives occasionally used  
4  
5 fundal height measurements to estimate gestational age.  
6  
7  
8  
9

### 10 *Statistical Analysis*

11  
12 The prevalence of each birth outcome was calculated for  
13  
14 singletons and twins and higher order multiples were excluded  
15  
16 from analyses. Prevalence of preterm birth and very preterm  
17  
18 birth were calculated per pregnancy as both twins were born at  
19  
20 the same gestational age. Prevalence of stillbirth, low  
21  
22 birthweight and very low birthweight among twins were calculated  
23  
24 by pregnancy (defined as either twin with the outcome), and by  
25  
26 infant (defined as the outcome in the total number of individual  
27  
28 infants). When comparing birth outcomes between singletons vs.  
29  
30 twins, we used pregnancy as the unit of analysis (e.g. how many  
31  
32 pregnancies ended in at least one stillbirth). Log binomial  
33  
34 regression models were fit to determine the relative risk (RR),  
35  
36 adjusted risk ratio (aRR), and 95% confidence intervals (95% CI)  
37  
38 of adverse birth outcomes among twin compared with singleton  
39  
40 pregnancies. Multivariable models were adjusted for maternal  
41  
42 age, gravida, educational attainment, and maternal HIV status,  
43  
44 which were chosen a priori based on prior analysis of risk  
45  
46 factors for adverse birth outcomes in Tsepamo [17-19].  
47  
48  
49  
50  
51 Statistical analyses were performed using SAS software.  
52  
53  
54  
55  
56  
57  
58  
59  
60

### *Patient and public involvement*

Patients and the public were not involved in the design or conduct of this study.

## **Results**

### *Study Population*

Between August 2014 and March 2019, there were 121,385 infants born to 119,477 women who delivered in the Tsepamo Study, including 117,593 (98.4%) singletons, 3718 twin infants (1859 sets of twins) (1.6%), 69 triplet infants (23 sets of triplets) (0.00%), 4 quadruplets (1 set) (0.00%) and 1 with missing data for delivery number.

### *Maternal Characteristics and Obstetric Care*

Maternal demographics and obstetric care parameters are shown in Table 1. Women with twin pregnancies were older, less likely to be primigravid, and more likely to have had >4 prior pregnancies compared with women with singleton pregnancies. The median

1  
2  
3 number of antenatal care visits was similar among women with  
4  
5 singletons (10) and women with twins (9). Prenatal ultrasound  
6  
7 was performed in 78.5% (980/1248) of women with twin pregnancies  
8  
9 at a median gestational age (GA) of 25 [IQR 19, 31] weeks (20.3%  
10  
11 prior to 20 weeks GA). In comparison, 66.9% (52,012/77,786) of  
12  
13 women with singleton pregnancies received an ultrasound scan, at  
14  
15 a median GA of 27 [IQR 20, 33] weeks (14.6% prior to 20 weeks  
16  
17 GA). Twins were more likely to be delivered in a tertiary  
18  
19 hospital (54.8% vs. 45.1%) and also more likely to deliver via  
20  
21 Cesarean-section (54.6% vs. 22.0%).  
22  
23  
24  
25  
26  
27

### 28 *Birth Outcomes*

29  
30 The median gestational age was 39 weeks [IQR 37,40], and the  
31  
32 median birthweight was 3080g [IQR 2750, 3400] among all  
33  
34 singletons with 114,749 (97.6%) infants live-born. Among twin  
35  
36 pregnancies, the median gestational age was 37 weeks [IQR 34,38]  
37  
38 and the median birthweight was 2330g [IQR 1920, 2675] with 3,552  
39  
40 (95.5%) infants live-born. Twin infants had lower mean head  
41  
42 circumference than singletons (32.4cm vs. 45.6cm) and lower mean  
43  
44 length at birth (34.1cm and 50.1cm).  
45  
46  
47  
48  
49

50  
51 Twin pregnancies were more likely to result in preterm birth  
52  
53 than singleton pregnancies (Table 2). Compared with singletons,  
54  
55 twin pregnancies had a higher risk of preterm birth (47.6% vs.  
56  
57  
58  
59

1  
2  
3 16.7%, aRR 2.8, 95% CI 2.7,3.2.9) and very preterm birth (11.8%  
4  
5 vs. 4.0%, aRR 3.0, 95% CI 2.6, 3.4). C-sections were more common  
6  
7 in preterm twins than preterm singletons (47.7% vs. 23.0%),  
8  
9 however, among very preterm births (<32 weeks GA), C-section  
10  
11 rate was similar (24.9% vs. 22.7%).  
12  
13  
14  
15

16  
17 Among all 3,718 individual twin infants, 2397 (64.5%) were low  
18  
19 birthweight, 508 (13.7%) were very low birthweight and 166  
20  
21 (4.5%) were stillborn. Both twins were low birthweight in 52% of  
22  
23 pregnancies, very low birthweight in 10.6% of pregnancies, and  
24  
25 stillborn in 2.0%. The first born twin and the second born twin  
26  
27 had similar rates of low and very low birthweight, but twin 2  
28  
29 was more likely to be stillborn than twin 1 (5.2% vs. 3.8%)  
30  
31 (Table 3). The risk of at least one infant being low birthweight  
32  
33 (aRR 4.5, 95% CI 4.3, 4.6), very low birthweight (aRR 5.2, 95%  
34  
35 CI 4.7, 5.8) or stillbirth (aRR 2.8, 95% CI 2.3, 3.3) was higher  
36  
37 among twin pregnancies than singleton pregnancies (Table 3).  
38  
39  
40  
41  
42  
43  
44  
45  
46  
47  
48  
49  
50

51 **Table 1.** Maternal Characteristics and Obstetric Care

|  | <b>Twin<br/>Pregnancies<br/>(N=1859)</b> | <b>Singleton<br/>Pregnancies<br/>(N=117,593)</b> |
|--|------------------------------------------|--------------------------------------------------|
|  |                                          |                                                  |

| <b>Maternal Characteristics</b>                         |                                 |                                    |
|---------------------------------------------------------|---------------------------------|------------------------------------|
| Maternal Age (median, IQR)                              | 29 [24, 34]<br>0                | 26 [22, 32]<br>71                  |
| Missing                                                 |                                 |                                    |
| Primigravid                                             | 405 (21.8%)                     | 42385 (36.1%)                      |
| Grand Multip (>4 prior pregnancies)                     | 280 (15.1%)                     | 12369 (10.5%)                      |
| Missing                                                 | 3                               | 391                                |
| Low Maternal Education (completed none or primary only) | 167 (9.2%)                      | 8624 (7.5%)                        |
| Missing                                                 | 55                              | 2934                               |
| Botswana Citizen                                        | 1761 (94.7%)                    | 113386 (96.4%)                     |
| Non-Citizen                                             | 89 (4.79%)                      | 3674 (3.12%)                       |
| Missing                                                 | 9                               | 400                                |
| HIV-Infected                                            | 562 (30.5%)                     | 28264 (24.2%)                      |
| Missing                                                 | 17                              | 934                                |
| <b>Obstetric Care</b>                                   |                                 |                                    |
| Antenatal Care Visits (median, IQR)                     | 9 [6, 12]<br>21 (1.1%)          | 10 [7, 12]<br>1112 (1.0%)          |
| Missing (%)                                             |                                 |                                    |
| Ultrasound                                              |                                 |                                    |
| Total with Ultrasound during pregnancy*                 | 980/1248 (78.5%)<br>25 [19, 31] | 52,012/77786 (66.9%)               |
| Median Gestational Age at U/S                           | 243/1199 (20.3%)<br>49          | 27 [20, 33]<br>10706/73522 (14.6%) |
| Ultrasound Scan <20wks gestation                        |                                 |                                    |
| Missing Ultrasound Date                                 |                                 | 4264                               |
| Delivered in Tertiary Hospital                          | 1019 (54.8%)<br>0               | 53040 (45.1%)<br>1                 |
| Missing                                                 |                                 |                                    |
| C-Section                                               | 1015 (54.6%)                    | 25887 (22.0%)                      |
| Missing method of delivery                              | 0                               | 2                                  |

\*Captured in Tsepamo beginning 3/31/2016

**Table 2.** Preterm Birth among twin and singleton pregnancies

|                                        | <b>Twin Pregnancies (N=1859)</b> | <b>Singleton Pregnancies (N=117,593)</b> | <b>Relative Risk (RR)</b> | <b>Adjusted Relative Risk* (ARR)</b> |
|----------------------------------------|----------------------------------|------------------------------------------|---------------------------|--------------------------------------|
| <b>Preterm birth (&lt;37 wks)</b>      | 873 (47.6%)                      | 19462 (16.7%)                            | 2.8, 95% CI 2.7,          | 2.8, 95% CI                          |
| Missing (%)                            | 25 (1.3%)                        | 1391 (1.2%)                              | 3.0                       | 2.7, 2.9                             |
| <b>Very Preterm birth (&lt;32 wks)</b> | 217 (11.8%)                      | 4664 (4.0%)                              | 2.9 95% CI 2.6,           | 3.0, 95% CI 2.6,                     |
| Missing (%)                            | 25 (1.3%)                        | 1391 (1.2%)                              | 3.4                       | 3.4                                  |

**Table 3.** Birth Outcomes among twins by birth order

|                                         | <b>Twin Pregnancies (N=1859, resulting in 3718 Infants)</b> |                                |                                      |                                        | <b>Singleton Pregnancies (N=117,594)</b> | <b>RR (singleton vs. any twin)</b> | <b>aRR* (singleton vs. any twin)</b> |
|-----------------------------------------|-------------------------------------------------------------|--------------------------------|--------------------------------------|----------------------------------------|------------------------------------------|------------------------------------|--------------------------------------|
|                                         | <b>Twin 1 N=1859 (Infants)</b>                              | <b>Twin 2 N=1859 (Infants)</b> | <b>Any Twin N=1859 (Pregnancies)</b> | <b>Both Twins N=1859 (Pregnancies)</b> |                                          |                                    |                                      |
| <b>Low birthweight (&lt;2500g)</b>      | 1158 (62.4%)                                                | 1239 (67.0%)                   | 1430 (77.1%)                         | 967 (52.0%)                            | 16019 (13.6%)                            | 5.7 (95% CI                        | 4.5 (95% CI                          |
| Missing (N, %)                          | 4                                                           | 9                              | 4                                    | 4                                      | 138                                      | 5.5, 5.8)                          | 4.3, 4.6)                            |
| <b>Very Low birthweight (&lt;1500g)</b> | 237 (12.8%)                                                 | 271 (14.6%)                    | 311 (16.8%)                          | 197 (10.6%)                            | 3757 (3.2%)                              | 5.2 (95% CI                        | 5.2 (95% CI                          |
| Missing (N, %)                          | 4                                                           | 9                              | 4                                    | 4                                      | 138                                      | 4.7, 5.8)                          | 4.7, 5.8)                            |
| <b>Stillbirth</b>                       | 70/1859 (3.8%)                                              | 96/1859 (5.2%)                 | 128 (6.9%)                           | 38 (2.0%)                              | 2845 (2.4%)                              | 2.8, (95% CI                       | 2.8 (95% CI                          |

|                           |   |                 |   |   |    |              |              |
|---------------------------|---|-----------------|---|---|----|--------------|--------------|
| <b>Missing<br/>(N, %)</b> | 0 | (5.2%<br>)<br>4 | 4 | 0 | 18 | 2.4,<br>3.4) | 2.3,<br>3.3) |
|---------------------------|---|-----------------|---|---|----|--------------|--------------|

\*adjusted for maternal age, gravida and educational attainment and maternal HIV status

## **Discussion**

We performed the first published analysis of the prevalence and outcomes of twin births in Botswana using nationally representative data from 2014-2019. Because of the absence of medically assisted reproduction, Botswana represents a particularly valuable opportunity to study naturally occurring rates and outcomes of twinning. We found that twin births occurred in 16 per 1000 pregnancies, a prevalence much higher than reported twinning rates in LMIC outside of sub-Saharan Africa. We also found that adverse birth outcomes were high among twin pregnancies, including a 6.9% stillbirth prevalence, almost 3-fold higher than stillbirths in singleton pregnancies (2.4%).

The rate of twinning in our study, 16/1000 pregnancies, is consistent with previously reported high rates of naturally



1  
2  
3 occurring twins in Southern Africa (12-15/1000 pregnancies in  
4 Namibia, South Africa, and Lesotho and 15-18/1000 pregnancies in  
5 Zimbabwe) [10]. In contrast, very low twinning rates (6-9/1000  
6 pregnancies) have been documented in LMIC across East Asia and  
7 Central and South America [10]. Geographical differences in  
8 naturally occurring twin birth rates are primarily due to  
9 genetic, racial, and ethnic differences in predisposition to  
10 dizygotic (DZ) twin birth [10]. While the rate of twinning in  
11 Botswana is high compared to other LMIC, it is lower than that  
12 in many high-income countries (HIC), where the introduction of  
13 medically assisted reproduction has led to dramatic increases in  
14 twinning rates over the past several decades. In the United  
15 States, for example, the rate of twin births rose from 18.9 per  
16 1000 births in 1980 to 33.9 per 1000 births in 2014 [20, 21].

17  
18  
19  
20  
21  
22  
23  
24  
25  
26  
27  
28  
29  
30  
31  
32  
33  
34  
35  
36  
37 The prevalence of stillbirths among twin pregnancies in Botswana  
38 (6.9%) is well above the WHO's target of under 12 stillbirths  
39 per 1000 births [22, 23]. However, our prevalence is similar to  
40 that reported across sub-Saharan Africa, and lower than a  
41 reported 10.2% stillbirth prevalence among twins in one Nigerian  
42 study [24]. In contrast, the prevalence of stillbirth in twins  
43 in Botswana is higher than in high-income countries such as the  
44 United States (USA) (0.35%) [25] and South Korea (0.48%) [26].  
45  
46  
47  
48  
49  
50  
51  
52  
53  
54  
55  
56  
57  
58  
59  
60  
The prevalence of stillbirth among singletons in our study is

1  
2  
3 2.4%, which is nearly 10 times greater than that among  
4  
5 singletons in many high-income countries [27, 28]. While twin  
6  
7 pregnancies are clearly particularly high-risk and contribute  
8  
9 substantially to perinatal mortality, the high prevalence of  
10  
11 stillbirths among all pregnancies in Botswana highlights a  
12  
13 strong need for interventions to decrease stillbirths in the  
14  
15 entire population.  
16  
17  
18  
19  
20

21 The prevalence of preterm birth among twin pregnancies (46.%) in  
22  
23 Botswana is substantially higher than that among singleton  
24  
25 pregnancies (16.8%) and slightly higher than reported prevalence  
26  
27 of preterm birth among twins in other sub-Saharan countries  
28  
29 [24]. However, prevalence of preterm birth with twin pregnancy  
30  
31 in Botswana is lower than the United States, where 60% of twin  
32  
33 pregnancies have preterm births [6, 28]. While the high  
34  
35 prevalence of preterm births among twins in the US may be  
36  
37 partially attributed to the increased risk for preterm birth in  
38  
39 multiple gestation, it may also be explained by clearer  
40  
41 antenatal care guidelines and closer prenatal monitoring among  
42  
43 twin pregnancies in the US compared to Botswana. The high  
44  
45 prevalence of preterm birth among twins in the US is in line  
46  
47 with the American College of Obstetrics and Gynecology's  
48  
49 guidelines, which recommend timing delivery based on  
50  
51 chorionicity (38 weeks for dichorionic-diamniotic, 34-36 6/7  
52  
53  
54  
55  
56  
57  
58  
59  
60

1  
2  
3 weeks for monochorionic-diamniotic, 32-34 for monochorionic-  
4 monoamniotic) and delivery by 37-38 week's gestation in  
5 uncomplicated twin pregnancies to reduce the risk of stillbirth  
6 [29-32].  
7  
8  
9  
10  
11  
12  
13

14 The relatively low rate of preterm birth and high rate of  
15 stillbirth among twin pregnancies in Botswana raises the  
16 question of whether twin stillbirths in Botswana could be  
17 decreased by increasing delivery of high-risk (monochorionic-  
18 monoamniotic, monochorionic-diamniotic) twin pregnancies between  
19 34 and 37 weeks [31-33]. To implement this type of change,  
20 improvements in proportion of ultrasound in the first trimester  
21 of twin pregnancy to identify chorionicity and to improve  
22 accuracy of gestational age dating would be needed.  
23  
24  
25  
26  
27  
28  
29  
30  
31  
32  
33

34 Additionally, preterm delivery may carry increased risk in low  
35 resource settings like Botswana where intensive neonatal care  
36 services are limited. Though delivery by 37 weeks may not be  
37 appropriate in all settings, closer surveillance of twin  
38 pregnancies after 34 weeks GA, at which time the risk of  
39 stillbirth and maternal complications begins to rise, may  
40 improve twin outcomes in Botswana [26]. Close monitoring for  
41 fetal growth concordance [34], screening for aneuploidy, which  
42 is more common among twin pregnancies and associated with higher  
43 risk of stillbirth [35, 36], and clear delivery planning during  
44  
45  
46  
47  
48  
49  
50  
51  
52  
53  
54  
55  
56  
57  
58  
59  
60

1  
2  
3 antenatal care may also help to reduce adverse perinatal  
4  
5 outcomes among twins. In addition to increased antenatal care,  
6  
7 improvements in maternal nutrition may help improve outcomes in  
8  
9 twin pregnancies in Botswana. Despite the relatively lower  
10  
11 prevalence of preterm births in Botswana, we found very high  
12  
13 rates of LBW and VLBW among twins (77.2% and 16.8%,  
14  
15 respectively, compared to 55.6% and 9.1% in the USA) [7], which  
16  
17 is likely multifactorial, but suggests that women with twin  
18  
19 pregnancies in Botswana may not receive adequate nutrition to  
20  
21 support multiple gestations [37, 38].  
22  
23  
24  
25  
26  
27

28 Strengths of this study include the large, nationally  
29  
30 representative sample with little missing data.  
31

32 Our study also has several limitations. Due to the limited  
33  
34 availability of early prenatal ultrasound, gestational age may  
35  
36 be less accurate and we are unable to determine the cause of  
37  
38 preterm birth or whether preterm birth is spontaneous.  
39  
40

41 Similarly, we cannot determine the proportion of C-sections that  
42  
43 are planned vs. emergent, and do not have data on the  
44  
45 indications for delivery via C-section (including presentation  
46  
47 of infants). We are also unable to distinguish the proportion of  
48  
49 twins that are monochorionic (MC), which is a known risk factor  
50  
51 for stillbirth and neonatal death [9, 33]. However, the  
52  
53 prevalence of MC twins is thought to be relatively constant  
54  
55  
56  
57  
58  
59  
60

1  
2  
3 worldwide (prevalence of DZ twins varies), so this is unlikely  
4  
5 to explain the high prevalence of stillbirth that we found among  
6  
7 twin pregnancies in Botswana [39, 40]. Finally, due to our study  
8  
9 design, we are unable to evaluate the impact of preterm and low  
10  
11 birthweight on longer-term outcomes of twins, or estimate  
12  
13 perinatal mortality.  
14  
15

### 16 17 18 **Conclusions**

19  
20  
21 In summary, we found that the prevalence of twinning is high in  
22  
23 Botswana and adverse birth outcomes are common among twin  
24  
25 pregnancies and are often severe. The high rate of stillborn and  
26  
27 LBW twins despite a relatively low preterm birthrate compared to  
28  
29 twins in high-income countries points to the need for  
30  
31 interventions that include early ultrasound and identification  
32  
33 of twin gestation and type of twin gestation, improved maternal  
34  
35 nutrition, close antepartum surveillance, and advanced delivery  
36  
37 planning in order to reduce morbidity and mortality among twin  
38  
39 pregnancies in Botswana.  
40  
41  
42  
43  
44  
45  
46  
47

### 48 **Abbreviations**

49 GA: Gestational Age  
50 RR: Relative Risk  
51 aRR: Adjusted Relative Risk  
52 IQR: Inter-Quartile Range  
53 LMIC: Low- and Middle-Income Countries  
54 HIC: High-Income Countries  
55  
56  
57  
58  
59  
60

1  
2  
3 LBW: Low Birthweight  
4 VLBW: Very Low Birthweight  
5 HIV: Human Immunodeficiency Virus  
6 MZ: monozygotic  
7 DZ: dizygotic  
8 MC: monochorionic  
9 DC: dichorionic  
10  
11  
12

### 13 Competing Interests

14  
15 The authors declare that they have no competing interests.  
16  
17

### 18 Funding:

19  
20 Supported by grants from the Eunice Kennedy Shriver National  
21 Institute of Child Health and Human Development (NICHD),  
22 National Institutes of Health (R01 HD080471 and R01 HD095766, to  
23 Dr. Shapiro; and K23 HD088230, to Dr. Zash).  
24  
25  
26

### 27 Data Availability

28  
29 Per Botswana IRB regulations, de-identified data from the  
30 Tsepamo study can be requested from the Principal Investigator  
31 of the Study.  
32  
33  
34

### 35 Authors' contributions

36  
37 AI and RZ designed and performed the analysis and drafted the  
38 initial manuscript. RLS, JM, MM, RZ, DJ contributed to the  
39 design, data collection and study oversight of the parent study.  
40 GM, MD, JM, SD, AI oversaw data collection and data cleaning.  
41 All authors contributed substantive feedback, revised and  
42 approved the final manuscript.  
43  
44  
45

### 46 Acknowledgements

47 We thank our research assistants Cynthia Dube, Daphne Segobye,  
48 Gosego Legase, Keemenao France, Mmapula Ofhentse, Naledi  
49 Kamanga, Onkabetse Mokgosi, Rosemary Moremi, Shally Morgan,  
50 Tsaone Gaonakala, Tshepang Motlotlegi, Edith Moseki, Patricia  
51 Mophutegi, Keba Rabasiako, Nametsang Tshosa, Maipelo Kegakilwe,  
52 Masego Kgafela, Tshegofato Motladile, Tsholofelo Tsokunyane,  
53 Kealeboga Mmokele, Obakeng Makalane, Thuto Rabana, Seele  
54 Mafokate, Annah Bojang, Tlhabologo Baitsemi, Priscilla Mashona,  
55  
56  
57  
58  
59  
60

1  
2  
3 and Bathoba Mabiletsa; the maternity staff and administrators at  
4 the 18 participating hospitals; the members of the Botswana  
5 Ministry of Health and Wellness and the Department of Maternal  
6 and Child Health.  
7

## 8 9 References

- 10  
11 1. Hanson C, Munjanja S, Binagwaho A, Vwalika B, Pembe AB,  
12 Jacinto E, et al. National policies and care provision in  
13 pregnancy and childbirth for twins in Eastern and Southern  
14 Africa: A mixed- methods multi-country study. PLoS Med.  
15 2019;16(2).
- 16  
17 2. Lawn J, Mongi P, Cousens S. Africa's newborns—counting them  
18 and making them count. In: Lawn J, Kerber K, editors.  
19 Opportunities for Africa's Newborns: Practical data, policy  
20 and programmatic support for newborn care in Africa. Cape  
21 Town: PMNCH; 2006. p. 11-22.
- 22  
23 3. Bellizzi S, Sobel H, Betran AP, Temmerman M. Early neonatal  
24 mortality in twin pregnancy: Findings from 60 low-and  
25 middle-income countries. J Glob Health. 2018;8(1).
- 26  
27 4. Peter C, Wenzlaff P, Kruempelmann J, Alzen G, Bueltmann E,  
28 Gruessner SE. Perinatal morbidity and early neonatal  
29 mortality in twin pregnancies. Open J Obstet Gynecol.  
30 2013;3(1):78-89.
- 31  
32 5. Hack KE, Derks JB, Elias SG, Franx A, Roos EJ, Voerman SK,  
33 et al. Increased perinatal mortality and morbidity in  
34 monochorionic versus dichorionic twin pregnancies: clinical  
35 implications of a large Dutch cohort study. BJOG.  
36 2007;115(1):58-67.
- 37  
38 6. Murray SR, Stock JS, Cowan S, Elizabeth SC, Norman JE.  
39 Spontaneous preterm birth prevention in multiple pregnancy.  
40 Obstet Gynaecol. 2018;20(1):57-63.
- 41  
42 7. Martin JA, Hamilton BE, Osterman MJ, Driscoll AK. Births:  
43 Final Data for 2018. National Vital Statistics Report, vol  
44 68, no 13. Hyattsville, MD: National Center for Health  
45 Statistics; 2019. 47 p.
- 46  
47 8. Christensen K, Bjerregaard-Anderson M. Twin-singleton  
48 early-life survival in sub-Saharan Africa. Lancet Glob  
49 Health. 2017;5(7):e636-7.
- 50  
51 9. Glinianaia SV, Obeysekera MA, Sturgiss S, Bell R.  
52 Stillbirth and neonatal mortality in monochorionic and  
53 dichorionic twins: a population-based study. Hum Reprod.  
54 2011;26(9):2549-57.
- 55  
56 10. Smits J, Monden C. Twinning across the Developing  
57 World. PLoS One. 2011;6(9).
- 58  
59 11. Monden CW, Smits J. Mortality among twins and  
60 singletons in sub-Saharan Africa between 1995 and 2014: a

- 1  
2  
3 pooled analysis of data from 90 Demographic and Health  
4 Surveys in 30 countries. *Lancet Glob Health*. 2017;5:e673-9.
- 5 12. Justesen A, Kunst A. Postneonatal and child mortality  
6 among twins in Southern and Eastern Africa. *Int J*  
7 *Epidemiol*. 2000;29(4):678-83.
- 8 13. Miyahara R, Jasseh M, Mackenzie GA, Bottomley C,  
9 Hossain MJ, Greenwood BM, et al. The large contribution of  
10 twins to neonatal and post-neonatal mortality in The  
11 Gambia, a 5-year prospective study. *BMC Pediatr*. 2016;16.
- 12 14. Mogobe KD, Tshiamo W, Bowelo M. Monitoring Maternity  
13 Mortality in Botswana. *Reprod Health Matters*.  
14 2007;15(30):163-71.
- 15 15. Madzimbamuto FD, Ray SC, Mogobe KD, Ramogola-Masire D,  
16 Phillips R, Haverkamp M, et al. A root-cause analysis of  
17 maternal deaths in Botswana: towards developing a culture  
18 of patient safety and quality improvement. *BMC Pregnancy*  
19 *Childbirth*. 2014;14.
- 20 16. Nkhwiluma L, Mashalla Y. Maternal mortality trends at  
21 the Princess Marina and Nyangabwe referral hospitals in  
22 Botswana. *Afr Health Sci*. 2019;19(2):1833-40.
- 23 17. Zash R, Jacobson DL, Diseko M, Mayondi G, Mmalane M,  
24 Essex M, et al. Comparative Safety of Antiretroviral  
25 Treatment Regimens in Pregnancy. *JAMA Pediatr*.  
26 2017;171(10).
- 27 18. Zash R, Holmes L, Diseko M, Jacobson DL, Brummel S,  
28 Mayondi G, et al. Neural-Tube Defects and Antiretroviral  
29 Treatment Regimens in Botswana. *New Engl J Med*.  
30 2019;381:827-40.
- 31 19. Zash R, Jacobson DL, Diseko M, Mayondi G, Mmalane M,  
32 Essex M, et al. Comparative safety of dolutegravir-based or  
33 efavirenz-based antiretroviral treatment started during  
34 pregnancy in Botswana: an observational study. *Lancet Glob*  
35 *Health*. 2018;6:e804-10.
- 36 20. Martin JA, Hamilton BE, Osterman MJ. Three Decades of  
37 Births in the United States, 1980-2009. Hyattsville, MD:  
38 National Center for Health Statistics; 2012. 8 p. Report  
39 No.: 80.
- 40 21. Martin JA, Osterman MJ. Is Twin Childbearing on the  
41 Decline? Twin Births in the United States, Hyattsville, MD:  
42 National Center for Health Statistics; 2019. 8 p. Report  
43 No.: 351.
- 44 22. Saleem S, Tikmani SS, McClure EM, Moore JL, Azam SI,  
45 Dhaded SM. Trends and determinants of stillbirth in  
46 developing countries: results from the Global Network's  
47 Population-Based Birth Registry. *Reprod Health*.  
48 2018;15(Suppl 1).
- 49  
50  
51  
52  
53  
54  
55  
56  
57  
58  
59  
60



23. Lawn JE, Blencowe H, Waiswa P, Amouzou A, Mathers C, Hogan D. Stillbirths: rates, risk factors, and acceleration towards 2030. *Lancet*. 2016;387:587-603.
24. Akaba GO, Agida TE, Onafowokan O, Offiong RA, Adewole ND. Review of Twin Pregnancies in a Tertiary Hospital in Abuja, Nigeria. *J Health Popul Nutr*. 2013;31(2):272-7.
25. Page JM, Pilliod RA, Snowden JM, Caughey AB. The risk of stillbirth and infant death by each additional week of expectant management in twin pregnancies. *Am J Obstet Gynecol*. 2015;212(5):630.e1-7.
26. Ko HS, Choi SK, Wie JH, Park IY, Park YG, Shin JC. Optimal Timing of Delivery Based on the Risk of Stillbirth and Infant Death Associated with Each Additional Week of Expectant Management in Multiple Pregnancies: a National Cohort Study of Koreans. *J Korean Med Sci*. 2018;33(10).
27. Flenady V, Wojcieszek AM, Middleton P, Ellwood D, Erwich JJ, Coory M. Stillbirths: recall to action in high-income countries. *Lancet*. 2016;387:691-702.
28. MacDorman MF, Gregory EC. Fetal and Perinatal Mortality: United States, 2013. *National Vital Statistics Report*. 2015;64(8).
29. Committee on Practice Bulletins—Obstetrics; Society for Maternal-Fetal Medicine. Practice Bulletin No. 169: Multifetal Gestations: Twin, Triplet, and Higher-Order Multifetal Pregnancies. *Obstet Gynecol*. 2016;128(4):e131-46.
30. Dodd JM, Crowther CA, Haslam RR, Robinson SJ. Timing of birth for women with a twin pregnancy at term: a randomized controlled trial. *BMC Pregnancy Childbirth*. 2010;10.
31. Dodd JM, Crowther CA, Haslam RR, Robinson SJ. Elective birth at 37 weeks of gestation versus standard care for women with an uncomplicated twin pregnancy at term: the Twins Timing of Birth Randomised Trial. *BJOG*. 2012;119(8):964-74.
32. Wood S, Tang S, Ross S, Sauve R. Stillbirth in twins, exploring the optimal gestational age for delivery: a retrospective cohort study. *BJOG*. 2014;121(10):1284-93.
33. Cheong-See F, Schuit E, Arroyo-Manzano D, Khalil A, Barrett J, Joseph KS, et al. Prospective risk of stillbirth and neonatal complications in twin pregnancies: systematic review and meta-analysis. *BMJ*. 2016;354.
34. D'Antonio F, Odibo AO, Prefumo F, Khalil A, Buca D, Flacco ME, et al. Weight Discordance and Perinatal Mortality in Twin Pregnancy: Systemic Review and Meta-Analysis. *Ultrasound Obstet Gynecol*. 2017;52(1):11-23.

- 1  
2  
3 35. Shi K, Li L, Huang X, Chen B, Zhou Y, Fang Q. Fetal  
4 Aneuploidy: A Comparison of Dichorionic Twins and  
5 Monochorionic Twins. *Fetal Diagn Ther*. 2018;44:124-8.  
6  
7 36. Audibert F, Gagnon A. No. 262-Prenatal Screening for  
8 and Diagnosis of Aneuploidy in Twin Pregnancies. *J Obstet*  
9 *Gynaecol Can*. 2017;93(9):e347-61.  
10  
11 37. Luke B. Nutrition in Multiple Gestations. *Clin*  
12 *Perinatol*. 2005;32:403-29.  
13  
14 38. Goodnight W, Newman R. Optimal Nutrition for Improved  
15 Twin Pregnancy Outcome. *Obstet Gynecol*. 2009;114(5):1121-  
16 34.  
17  
18 39. Pison G, D'Addato AV. Frequency of Twin Births in  
19 Developed Countries. *Twin Res Hum Genet*. 2006;9(2):250-9.  
20  
21 40. Hankins GV, Saade GR. Factors influencing twins and  
22 zygosity. *Paediatr Perinat Epidemiol*. 2005;19(Suppl 1):8-9.  
23  
24  
25  
26  
27  
28  
29  
30  
31  
32  
33  
34  
35  
36  
37  
38  
39  
40  
41  
42  
43  
44  
45  
46  
47  
48  
49  
50  
51  
52  
53  
54  
55  
56  
57  
58  
59  
60

STROBE Statement—Checklist of items that should be included in reports of *cross-sectional studies*

|                              | Item No | Recommendation                                                                                                                                                                                               | Page No |
|------------------------------|---------|--------------------------------------------------------------------------------------------------------------------------------------------------------------------------------------------------------------|---------|
| <b>Title and abstract</b>    | 1       | (a) Indicate the study's design with a commonly used term in the title or the abstract                                                                                                                       | 1       |
|                              |         | (b) Provide in the abstract an informative and balanced summary of what was done and what was found                                                                                                          | 2       |
| <b>Introduction</b>          |         |                                                                                                                                                                                                              |         |
| Background/rationale         | 2       | Explain the scientific background and rationale for the investigation being reported                                                                                                                         | 3       |
| Objectives                   | 3       | State specific objectives, including any prespecified hypotheses                                                                                                                                             | 4       |
| <b>Methods</b>               |         |                                                                                                                                                                                                              |         |
| Study design                 | 4       | Present key elements of study design early in the paper                                                                                                                                                      | 4       |
| Setting                      | 5       | Describe the setting, locations, and relevant dates, including periods of recruitment, exposure, follow-up, and data collection                                                                              | 5       |
| Participants                 | 6       | (a) Give the eligibility criteria, and the sources and methods of selection of participants                                                                                                                  | 5       |
| Variables                    | 7       | Clearly define all outcomes, exposures, predictors, potential confounders, and effect modifiers. Give diagnostic criteria, if applicable                                                                     | 5       |
| Data sources/<br>measurement | 8*      | For each variable of interest, give sources of data and details of methods of assessment (measurement). Describe comparability of assessment methods if there is more than one group                         | 5       |
| Bias                         | 9       | Describe any efforts to address potential sources of bias                                                                                                                                                    | 5,      |
| Study size                   | 10      | Explain how the study size was arrived at                                                                                                                                                                    | 4, 5    |
| Quantitative variables       | 11      | Explain how quantitative variables were handled in the analyses. If applicable, describe which groupings were chosen and why                                                                                 | 6       |
| Statistical methods          | 12      | (a) Describe all statistical methods, including those used to control for confounding                                                                                                                        | 6       |
|                              |         | (b) Describe any methods used to examine subgroups and interactions                                                                                                                                          | 6       |
|                              |         | (c) Explain how missing data were addressed                                                                                                                                                                  | 6       |
|                              |         | (d) If applicable, describe analytical methods taking account of sampling strategy                                                                                                                           | 6       |
|                              |         | (e) Describe any sensitivity analyses                                                                                                                                                                        | 6       |
| <b>Results</b>               |         |                                                                                                                                                                                                              |         |
| Participants                 | 13*     | (a) Report numbers of individuals at each stage of study—eg numbers potentially eligible, examined for eligibility, confirmed eligible, included in the study, completing follow-up, and analysed            | 7       |
|                              |         | (b) Give reasons for non-participation at each stage                                                                                                                                                         | n/a     |
|                              |         | (c) Consider use of a flow diagram                                                                                                                                                                           | n/a     |
| Descriptive data             | 14*     | (a) Give characteristics of study participants (eg demographic, clinical, social) and information on exposures and potential confounders                                                                     | 9       |
|                              |         | (b) Indicate number of participants with missing data for each variable of interest                                                                                                                          | 10      |
| Outcome data                 | 15*     | Report numbers of outcome events or summary measures                                                                                                                                                         | 10      |
| Main results                 | 16      | (a) Give unadjusted estimates and, if applicable, confounder-adjusted estimates and their precision (eg, 95% confidence interval). Make clear which confounders were adjusted for and why they were included | 8, 10   |

|                          |    |                                                                                                                                                                            |        |
|--------------------------|----|----------------------------------------------------------------------------------------------------------------------------------------------------------------------------|--------|
|                          |    | (b) Report category boundaries when continuous variables were categorized                                                                                                  | 5      |
|                          |    | (c) If relevant, consider translating estimates of relative risk into absolute risk for a meaningful time period                                                           | n/a    |
| Other analyses           | 17 | Report other analyses done—eg analyses of subgroups and interactions, and sensitivity analyses                                                                             | 9, 10  |
| <b>Discussion</b>        |    |                                                                                                                                                                            |        |
| Key results              | 18 | Summarise key results with reference to study objectives                                                                                                                   | 11     |
| Limitations              | 19 | Discuss limitations of the study, taking into account sources of potential bias or imprecision. Discuss both direction and magnitude of any potential bias                 | 14     |
| Interpretation           | 20 | Give a cautious overall interpretation of results considering objectives, limitations, multiplicity of analyses, results from similar studies, and other relevant evidence | 13, 14 |
| Generalisability         | 21 | Discuss the generalisability (external validity) of the study results                                                                                                      | 12-14  |
| <b>Other information</b> |    |                                                                                                                                                                            |        |
| Funding                  | 22 | Give the source of funding and the role of the funders for the present study and, if applicable, for the original study on which the present article is based              | 15     |

\*Give information separately for exposed and unexposed groups.

**Note:** An Explanation and Elaboration article discusses each checklist item and gives methodological background and published examples of transparent reporting. The STROBE checklist is best used in conjunction with this article (freely available on the Web sites of PLoS Medicine at <http://www.plosmedicine.org/>, Annals of Internal Medicine at <http://www.annals.org/>, and Epidemiology at <http://www.epidem.com/>). Information on the STROBE Initiative is available at [www.strobe-statement.org](http://www.strobe-statement.org).

# BMJ Open

## Prevalence and Outcomes of Twin Pregnancies in Botswana: a National Birth Outcomes Surveillance Study

|                                 |                                                                                                                                                                                                                                                                                                                                                                                                                                                                                                                                                                                                                                                                                                                                                                                                                                                                                                                                |
|---------------------------------|--------------------------------------------------------------------------------------------------------------------------------------------------------------------------------------------------------------------------------------------------------------------------------------------------------------------------------------------------------------------------------------------------------------------------------------------------------------------------------------------------------------------------------------------------------------------------------------------------------------------------------------------------------------------------------------------------------------------------------------------------------------------------------------------------------------------------------------------------------------------------------------------------------------------------------|
| Journal:                        | <i>BMJ Open</i>                                                                                                                                                                                                                                                                                                                                                                                                                                                                                                                                                                                                                                                                                                                                                                                                                                                                                                                |
| Manuscript ID                   | bmjopen-2020-047553.R1                                                                                                                                                                                                                                                                                                                                                                                                                                                                                                                                                                                                                                                                                                                                                                                                                                                                                                         |
| Article Type:                   | Original research                                                                                                                                                                                                                                                                                                                                                                                                                                                                                                                                                                                                                                                                                                                                                                                                                                                                                                              |
| Date Submitted by the Author:   | 27-Jul-2021                                                                                                                                                                                                                                                                                                                                                                                                                                                                                                                                                                                                                                                                                                                                                                                                                                                                                                                    |
| Complete List of Authors:       | Isaacson, Arielle; Harvard Medical School; Botswana-Harvard AIDS Institute Partnership<br>Diseko, Modiegi; Botswana-Harvard AIDS Institute Partnership<br>Mayondi, Gloria; Botswana-Harvard AIDS Institute Partnership<br>Mabuta, Judith; Botswana-Harvard AIDS Institute Partnership<br>Davey, Sonya; Brigham and Women's Hospital; Botswana-Harvard AIDS Institute Partnership<br>Mmalane, Mompoti; Botswana-Harvard AIDS Institute Partnership<br>Makhema, Joseph; Botswana-Harvard AIDS Institute Partnership<br>Jacobson, DL; Harvard University T H Chan School of Public Health, Biostat<br>Lockett, Rebecca; Beth Israel Deaconess Medical Center; Botswana-Harvard AIDS Institute Partnership<br>Shapiro, Roger; Botswana-Harvard AIDS Institute Partnership; Harvard University T H Chan School of Public Health<br>Zash, Rebecca; Beth Israel Deaconess Medical Center; Botswana-Harvard AIDS Institute Partnership |
| <b>Primary Subject Heading</b>: | Global health                                                                                                                                                                                                                                                                                                                                                                                                                                                                                                                                                                                                                                                                                                                                                                                                                                                                                                                  |
| Secondary Subject Heading:      | Obstetrics and gynaecology, Paediatrics, Public health                                                                                                                                                                                                                                                                                                                                                                                                                                                                                                                                                                                                                                                                                                                                                                                                                                                                         |
| Keywords:                       | Community child health < PAEDIATRICS, PUBLIC HEALTH, OBSTETRICS                                                                                                                                                                                                                                                                                                                                                                                                                                                                                                                                                                                                                                                                                                                                                                                                                                                                |
|                                 |                                                                                                                                                                                                                                                                                                                                                                                                                                                                                                                                                                                                                                                                                                                                                                                                                                                                                                                                |

SCHOLARONE™  
Manuscripts

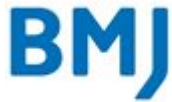

I, the Submitting Author has the right to grant and does grant on behalf of all authors of the Work (as defined in the below author licence), an exclusive licence and/or a non-exclusive licence for contributions from authors who are: i) UK Crown employees; ii) where BMJ has agreed a CC-BY licence shall apply, and/or iii) in accordance with the terms applicable for US Federal Government officers or employees acting as part of their official duties; on a worldwide, perpetual, irrevocable, royalty-free basis to BMJ Publishing Group Ltd ("BMJ") its licensees and where the relevant Journal is co-owned by BMJ to the co-owners of the Journal, to publish the Work in this journal and any other BMJ products and to exploit all rights, as set out in our [licence](#).

The Submitting Author accepts and understands that any supply made under these terms is made by BMJ to the Submitting Author unless you are acting as an employee on behalf of your employer or a postgraduate student of an affiliated institution which is paying any applicable article publishing charge ("APC") for Open Access articles. Where the Submitting Author wishes to make the Work available on an Open Access basis (and intends to pay the relevant APC), the terms of reuse of such Open Access shall be governed by a Creative Commons licence – details of these licences and which [Creative Commons](#) licence will apply to this Work are set out in our licence referred to above.

Other than as permitted in any relevant BMJ Author's Self Archiving Policies, I confirm this Work has not been accepted for publication elsewhere, is not being considered for publication elsewhere and does not duplicate material already published. I confirm all authors consent to publication of this Work and authorise the granting of this licence.

1  
2  
3  
4 **Title:** Prevalence and Outcomes of Twin Pregnancies in Botswana: a National Birth Outcomes  
5 Surveillance Study  
6

7  
8 **Authors:** Arielle Isaacson<sup>1</sup>, Modiegi D. Diseko<sup>2</sup>, Gloria K. Mayondi<sup>2</sup>, Judith Mabuta<sup>2</sup>, Sonya  
9 Davey<sup>2,6</sup>, Mompoti Mmalane<sup>2</sup>, Joseph Makhema<sup>2</sup>, DL Jacobson,<sup>5</sup> Rebecca Lockett,<sup>2,3</sup> Roger L.  
10 Shapiro,<sup>2,3,4</sup> Rebecca Zash<sup>2,3,4</sup>  
11

12  
13 **Affiliations:**

14 <sup>1</sup>Harvard Medical School, Boston MA, USA

15 <sup>2</sup>Botswana Harvard AIDS Institute Partnership, Gaborone, Botswana

16 <sup>3</sup>Beth Israel Deaconess Medical Center, Boston, MA, USA

17 <sup>4</sup>Harvard T.H. Chan School of Public Health, Boston, MA, USA

18 <sup>5</sup>Center for Biostatistics in AIDS Research, Harvard T.H. Chan School of Public Health, Boston,  
19 Massachusetts, USA

20 <sup>6</sup>Brigham and Women's Hospital, Boston, MA, USA  
21  
22  
23  
24  
25  
26  
27

28 Corresponding Author: Arielle Isaacson

29 Email: [arielleisaacson@hms.harvard.edu](mailto:arielleisaacson@hms.harvard.edu)

30  
31 Postal Address: 48 Solomon Pierce Road, Lexington, MA 02420  
32  
33  
34  
35

36 Word Count: 2632  
37  
38  
39  
40  
41  
42  
43  
44  
45  
46  
47  
48  
49  
50  
51  
52  
53  
54  
55  
56  
57  
58  
59  
60

## ABSTRACT

**Objectives:** This study aims to evaluate the prevalence and outcome of twin pregnancies in Botswana.

**Setting:** The Tsepamo Study conducted birth outcomes surveillance at 8 government-run hospitals (~45% of all births in Botswana) from August 2014-June 2018 and expanded to 18 hospitals (~70% of all births in Botswana) from July 2018-March 2019.

**Participants:** Data were collected for all live-born and stillborn in-hospital deliveries with a gestational age (GA) greater than 24 weeks. This analysis included 117,593 singleton and 3,718 twin infants (1859 sets [1.6%]) born to 119,477 women between August 2014-March 2019 and excluded 73 higher order multiples (23 sets of triplets and 1 set of quadruplets).

**Outcomes Measured:** Our primary outcomes were preterm delivery (<37 weeks GA), very preterm delivery (<32 weeks GA) and stillbirth (APGAR score of 0,0,0).

**Results:** Women with twin pregnancies had a similar median number of antenatal care visits (9 vs. 10), but were more likely to deliver in a tertiary center (54.8% vs. 45.1%,  $p<0.001$ ) and more likely to have a C-section (54.6% vs. 22.0%,  $p<0.001$ ) than women with singletons. Compared with singletons, twin pregnancies had a higher risk of preterm delivery (<37 weeks GA) (47.6% vs. 16.7%, aRR 2.8, 95% CI 2.7, 2.9) and very preterm delivery (<32 weeks) (11.8% vs. 4.0%,



1  
2  
3 aRR 3.0 95% CI 2.6, 3.4). Among all twin pregnancies, 128 (6.9%) had at least one stillborn  
4 infant compared with 2845 (2.4%) stillbirths among singletons (aRR 2.8, 95% CI 2.3, 3.3).  
5  
6  
7

### 8 **Conclusion:**

9  
10 Adverse birth outcomes are common among twins in Botswana, and are often severe.  
11 Interventions that allow for earlier identification of twin gestation and improved antenatal  
12 management of twin pregnancies may improve infant and child survival.  
13  
14  
15  
16  
17  
18  
19  
20  
21  
22  
23  
24

25 **Keywords:** Twins, multiple gestation, Botswana, sub-Saharan Africa, stillbirth, preterm, low-  
26 birthweight  
27  
28  
29  
30  
31  
32  
33  
34  
35  
36  
37  
38  
39  
40  
41  
42  
43  
44

### 45 Strengths and limitations of this study

- 46 • Our study uses a large, nationally representative sample with little missing data.
- 47 • Due to the limited availability of early prenatal ultrasound, gestational age may be less  
48 accurate and we are unable to determine the cause of preterm birth or whether preterm  
49 birth is spontaneous.
- 50 • We are unable to evaluate the impact of preterm and low birthweight on longer-term  
51 outcomes of twins, or estimate perinatal mortality.  
52  
53  
54  
55  
56  
57  
58  
59  
60

## Background

Twin pregnancies are universally considered to be 'high-risk'. Maternal complications including hypertensive disorders, anemia, post-partum hemorrhage, and maternal mortality, are more common among twin pregnancies than singleton pregnancies [1]. Twins are also more likely than singletons to be born preterm and to have restricted growth in-utero, thereby increasing their risk for intrauterine demise and neonatal mortality [2]. The majority of existing research on multigravid pregnancies and birth outcomes among twins is from high-resource settings [3]. In these settings, the perinatal mortality rate of twins is 3-7 times higher than that of singletons [4, 5] and up to 60% of twins are born preterm (before 37 weeks) [6, 7].

In most high resource settings, twin pregnancies are managed by routine prenatal monitoring and neonatal intensive care services, including early identification of twin pregnancies, serial antenatal ultrasound, referral to specialized centers, and prenatal counselling [8]. In lower resource settings data are limited, but twin pregnancies may be at particularly high risk for adverse birth outcomes because of the lack of routine intensive prenatal monitoring and neonatal intensive care services [1, 9]. Additionally, maternal outcomes with multigravid

1  
2  
3 pregnancies may also be worse because of limitations in management of maternal conditions  
4  
5  
6  
7 more common in twin pregnancies, such as post-partum hemorrhage and pre-eclampsia [3].  
8  
9

10           In Southern Africa, where assisted reproductive technology is not commonly available,  
11  
12 the incidence of naturally occurring twins is estimated to be high (12-18 per 1000 births)  
13  
14 compared to other low- and middle-income countries (LMIC) in East Asia and Latin America  
15  
16 where the incidence of twins is as low as 6-9 per 1000 births [10]. This relatively large number  
17  
18 of twins may contribute substantially to perinatal mortality in the region [11]. Increased  
19  
20 prevalence of preterm delivery and low-birth weight among twins leads to increased risk of  
21  
22 under-five mortality due to malnutrition, respiratory disorders, vulnerability to infection, and  
23  
24 developmental delays [12, 13]. It is estimated that one in five twins born in sub-Saharan Africa  
25  
26 dies before the age of five [11]. Prior studies of twins in sub-Saharan Africa pre-date  
27  
28 implementation of the United Nations Sustainable Development Goals (SDG) in 2015 and do not  
29  
30 evaluate specific birth outcomes [9-12]. This study focuses on Botswana, a country with a  
31  
32 rapidly growing economy, strong investment in healthcare, a national program to prevent  
33  
34 maternal mortality [14, 15], and a large, nationally-representative birth outcomes surveillance  
35  
36  
37  
38  
39  
40  
41  
42  
43  
44  
45  
46  
47  
48  
49  
50  
51  
52  
53  
54  
55  
56  
57  
58  
59  
60

1  
2  
3 study (Tsepamo). We aim to provide the first published data on the prevalence and outcome of  
4  
5  
6  
7 twin pregnancies in Botswana.  
8  
9  
10  
11  
12

### 13 Methods

#### 14 *The Tsepamo Study*

15  
16  
17  
18  
19  
20 The Tsepamo Study is a birth outcomes surveillance study in Botswana, where >95% of women  
21  
22  
23 deliver in health care settings (not at home) [16]. Details of methodology have been previously  
24  
25  
26 published [17, 18]. In summary, deidentified information was abstracted from obstetric cards  
27  
28  
29 (antenatal care records used throughout the pregnancy) at the time of discharge from the  
30  
31  
32  
33  
34 postnatal ward from women who deliver live-born or stillborn infants at select government  
35  
36  
37 maternity hospitals in Botswana. From August 2014-June 2018 data were collected from 8 sites  
38  
39  
40 across the country (~45% of births in Botswana) and from July 2018-March 2019 data were  
41  
42  
43  
44 collected from up to 18 sites (~72% of births in Botswana).  
45  
46  
47  
48  
49

50 At each site, data were collected for all in-hospital deliveries with a gestational age greater than  
51  
52  
53  
54 24 weeks. Information included maternal demographics, antenatal care visits, ultrasound reports  
55  
56  
57  
58  
59  
60

1  
2  
3  
4 with date of ultrasound, HIV status, method of delivery, and infant delivery characteristics  
5  
6  
7 (including the number of infants delivered, gestational age (GA) at delivery, birthweight, and  
8  
9  
10 vital status at birth and discharge).  
11  
12  
13  
14  
15  
16

### 17 *Outcomes*

18  
19  
20 The primary adverse outcomes assessed were stillbirth (APGAR scores 0,0,0), preterm birth  
21  
22  
23 (<37 weeks gestation), very preterm birth (<32 weeks gestation), low birthweight (LBW)  
24  
25  
26 (<2500g) and very low birthweight (VLBW)(<1500g). While APGAR scores and birthweights  
27  
28  
29 were recorded for each individual twin, neonatal death status was only collected on the first twin  
30  
31  
32 per the original protocol of our study. Therefore neonatal deaths in twins could not be analyzed  
33  
34  
35 and were not included as a primary outcome assessed. We chose not to provide data on neonatal  
36  
37  
38 deaths in twin 1 without data on twin 2 because it would only provide an incomplete comparison  
39  
40  
41 to singletons, which could over or underestimate the total NND among twins. The gestational  
42  
43  
44 age was documented by midwives at the time of delivery using the estimated delivery date  
45  
46  
47 (EDD), which is calculated at the first antenatal care visit based on the last reported menstrual  
48  
49  
50 period and confirmed by ultrasound when available. If the last menstrual period was unknown or  
51  
52  
53  
54  
55  
56  
57  
58  
59  
60

1  
2  
3 suspected to be incorrect, and if no ultrasound data was available, midwives occasionally used  
4  
5  
6  
7 fundal height measurements to estimate gestational age.  
8  
9

### 10 *Statistical Analysis*

11  
12  
13 The prevalence of each birth outcome was calculated for singletons and twins and higher order  
14  
15  
16 multiples were excluded from analyses. Prevalence of preterm birth and very preterm birth were  
17  
18  
19 calculated per pregnancy as both twins were born at the same gestational age. Prevalence of  
20  
21  
22 stillbirth, low birthweight and very low birthweight among twins were calculated by pregnancy  
23  
24  
25 (defined as either twin with the outcome), and by infant (defined as the outcome in the total  
26  
27  
28 number of individual infants). When comparing birth outcomes between singletons vs. twins, we  
29  
30  
31 used pregnancy as the unit of analysis (e.g. how many pregnancies ended in at least one  
32  
33  
34 stillbirth). Log binomial regression models were fit to determine the relative risk (RR), adjusted  
35  
36  
37 risk ratio (aRR), and 95% confidence intervals (95% CI) of adverse birth outcomes among twin  
38  
39  
40 compared with singleton pregnancies. Multivariable models were adjusted for maternal age,  
41  
42  
43  
44 gravida, educational attainment, and maternal HIV status, which were chosen a priori based on  
45  
46  
47  
48 prior analysis of risk factors for adverse birth outcomes in Tsepamo [17-19]. Statistical analyses  
49  
50  
51 were performed using SAS software.  
52  
53  
54  
55  
56  
57  
58  
59  
60

1  
2  
3  
4  
5  
6  
7 *Patient and public involvement*  
8  
9

10 Patients and the public were not involved in the design or conduct of this study.  
11  
12  
13  
14  
15  
16  
17  
18  
19  
20  
21  
22  
23  
24  
25  
26  
27  
28  
29  
30  
31  
32

33 **Results**  
34  
35  
36

37 *Study Population*  
38  
39

40 Between August 2014 and March 2019, there were 121,385 infants born to 119,477 women who  
41  
42  
43 delivered in the Tsepamo Study, including 117,593 (98.4%) singletons, 3718 twin infants (1859  
44  
45 sets of twins) (1.6%), 69 triplet infants (23 sets of triplets) (0.00%), 4 quadruplets (1 set) (0.00%)  
46  
47 and 1 with missing data for delivery number. Gestational age was known in 98.8% of singletons  
48  
49  
50 and 98.7% of twins.  
51  
52  
53  
54  
55  
56  
57  
58  
59  
60

### *Maternal Characteristics and Obstetric Care*

Maternal demographics and obstetric care parameters are shown in Table 1. Women with twin pregnancies were older, less likely to be primigravid, and more likely to have had >4 prior pregnancies compared with women with singleton pregnancies. The median number of antenatal care visits was similar among women with singletons (10) and women with twins (9). Prenatal ultrasound was performed in 78.5% (980/1248) of women with twin pregnancies at a median gestational age (GA) of 25 [IQR 19, 31] weeks (20.3% prior to 20 weeks GA). In comparison, 66.9% (52,012/77,786) of women with singleton pregnancies received an ultrasound scan, at a median GA of 27 [IQR 20, 33] weeks (14.6% prior to 20 weeks GA). Twins were more likely to be delivered in a tertiary hospital (54.8% vs. 45.1%) and also more likely to deliver via Cesarean-section (54.6% vs. 22.0%).

### *Birth Outcomes*

The median gestational age was 39 weeks [IQR 37,40], and the median birthweight was 3080g [IQR 2750, 3400] among all singletons with 114,749 (97.6%) infants live-born. Among twin



1  
2  
3 pregnancies, the median gestational age was 37 weeks [IQR 34,38] and the median birthweight  
4  
5  
6 was 2330g [IQR 1920, 2675] for the first twin and 2290g [IQR 1830, 2610] for the second twin  
7  
8  
9  
10 with 3,552 (95.5%) infants live-born. The mean head circumference was 32.4cm for both the  
11  
12  
13 first and second twin, and slightly lower than the mean head circumference for singletons  
14  
15  
16 (34.2cm). Mean length at birth was similar for the first and second twin (45.7cm and 45.4cm,  
17  
18  
19 respectively) but lower than the mean length of singletons (50.1cm).  
20  
21  
22  
23  
24  
25  
26

27 Twin pregnancies were more likely to result in preterm birth than singleton pregnancies (Table  
28  
29  
30 2). Compared with singletons, twin pregnancies had a higher risk of preterm birth (47.6% vs.  
31  
32  
33 16.7%, aRR 2.8, 95% CI 2.7,3.2.9) and very preterm birth (11.8% vs. 4.0%, aRR 3.0, 95% CI  
34  
35  
36 2.6, 3.4). C-sections were more common in preterm twins than preterm singletons (47.7% vs.  
37  
38  
39 23.0%), however, among very preterm births (<32 weeks GA), C-section rate was similar (24.9%  
40  
41  
42 vs. 22.7%).  
43  
44  
45  
46  
47  
48  
49

50 Among all 3,718 individual twin infants, 2397 (64.5%) were low birthweight, 508 (13.7%) were  
51  
52  
53 very low birthweight and 166 (4.5%) were stillborn. Both twins were low birthweight in 52% of  
54  
55  
56  
57  
58  
59  
60

pregnancies, very low birthweight in 10.6% of pregnancies, and stillborn in 2.0%. The first born twin and the second born twin had similar rates of low and very low birthweight, but twin 2 was more likely to be stillborn than twin 1 (5.2% vs. 3.8%) (Table 3). The risk of at least one infant being low birthweight (aRR 4.5, 95% CI 4.3, 4.6), very low birthweight (aRR 5.2, 95% CI 4.7, 5.8) or stillbirth (aRR 2.8, 95% CI 2.3, 3.3) was higher among twin pregnancies than singleton pregnancies (Table 3).

**Table 1. Maternal Characteristics and Obstetric Care**

|                                                         | <b>Twin Pregnancies (N=1859)</b> | <b>Singleton Pregnancies (N=117,593)</b> |
|---------------------------------------------------------|----------------------------------|------------------------------------------|
| <b>Maternal Characteristics</b>                         |                                  |                                          |
| Maternal Age (median, IQR)                              | 29 [24,34]                       | 26 [22,32]                               |
| Missing                                                 | 0                                | 71                                       |
| Primigravid                                             | 405 (21.8%)                      | 42385 (36.1%)                            |
| Grand Multip (>4 prior pregnancies)                     | 280 (15.1%)                      | 12369 (10.5%)                            |
| Missing                                                 | 3                                | 391                                      |
| Low Maternal Education (completed none or primary only) | 167 (9.2%)                       | 8624 (7.5%)                              |
| Missing                                                 | 55                               | 2934                                     |
| Botswana Citizen                                        | 1761 (94.7%)                     | 113386 (96.4%)                           |
| Non-Citizen                                             | 89 (4.79%)                       | 3674 (3.12%)                             |
| Missing                                                 | 9                                | 400                                      |
| HIV-Infected                                            | 562 (30.5%)                      | 28264 (24.2%)                            |

|                                         |                  |                      |
|-----------------------------------------|------------------|----------------------|
| Missing                                 | 17               | 934                  |
| <b>Obstetric Care</b>                   |                  |                      |
| Antenatal Care Visits (median, IQR)     | 9 [6,12]         | 10 [7,12]            |
| Missing (%)                             | 21 (1.1%)        | 1112 (1.0%)          |
| <b>Ultrasound</b>                       |                  |                      |
| Total with Ultrasound during pregnancy* | 980/1248 (78.5%) | 52,012/77786 (66.9%) |
| Median Gestational Age at U/S           | 25 [19, 31]      | 27 [20, 33]          |
| Ultrasound Scan <20wks gestation        | 243/1199 (20.3%) | 10706/73522 (14.6%)  |
| Missing Ultrasound Date                 | 49               | 4264                 |
| <b>Delivered in Tertiary Hospital</b>   |                  |                      |
| Delivered in Tertiary Hospital          | 1019 (54.8%)     | 53040 (45.1%)        |
| Missing                                 | 0                | 1                    |
| <b>C-Section</b>                        |                  |                      |
| C-Section                               | 1015 (54.6%)     | 25887 (22.0%)        |
| Missing method of delivery              | 0                | 2                    |

\*Captured in Tsepamo beginning 3/31/2016

**Table 2.** Preterm Birth among twin and singleton pregnancies

|  | <b>Twin<br/>Pregnancies<br/>(N=1859)</b> | <b>Singleton<br/>Pregnancies<br/>(N=117,593)</b> | <b>Relative<br/>Risk (RR)</b> | <b>Adjusted<br/>Relative<br/>Risk*</b> |
|--|------------------------------------------|--------------------------------------------------|-------------------------------|----------------------------------------|
|  |                                          |                                                  |                               |                                        |

|                                        |             |               |             | (ARR)       |
|----------------------------------------|-------------|---------------|-------------|-------------|
| <b>Preterm birth (&lt;37 wks)</b>      | 873 (47.6%) | 19462 (16.7%) | 2.8, 95% CI | 2.8, 95%    |
| Missing (%)                            | 25 (1.3%)   | 1391 (1.2%)   | 2.7, 3.0    | CI 2.7,2.9  |
| <b>Very Preterm birth (&lt;32 wks)</b> | 217 (11.8%) | 4664 (4.0%)   | 2.9 95% CI  | 3.0, 95%    |
| Missing (%)                            | 25 (1.3%)   | 1391 (1.2%)   | 2.6, 3.4    | CI 2.6, 3.4 |

**Table 3. Birth Outcomes among twins by birth order**

|                                         | Twin Pregnancies (N=1859, resulting in 3718 Infants) |                               |                                     |                                       | Singleton Pregnancies (N=117,594) | RR (singleton vs. any twin) | aRR* (singleton vs. any twin) |
|-----------------------------------------|------------------------------------------------------|-------------------------------|-------------------------------------|---------------------------------------|-----------------------------------|-----------------------------|-------------------------------|
|                                         | Twin 1<br>N=1859<br>(Infants)                        | Twin 2<br>N=1859<br>(Infants) | Any Twin<br>N=1859<br>(Pregnancies) | Both Twins<br>N=1859<br>(Pregnancies) |                                   |                             |                               |
| <b>Low birthweight (&lt;2500g)</b>      | 1158 (62.4%)                                         | 1239 (67.0%)                  | 1430 (77.1%)                        | 967 (52.0%)                           | 16019 (13.6%)                     | 5.7 (95% CI 5.5, 5.8)       | 4.5 (95% CI 4.3, 4.6)         |
| <b>Missing (N,%)</b>                    | 4                                                    | 9                             | 4                                   | 4                                     | 138                               |                             |                               |
| <b>Very Low birthweight (&lt;1500g)</b> | 237 (12.8%)                                          | 271 (14.6%)                   | 311 (16.8%)                         | 197 (10.6%)                           | 3757 (3.2%)                       | 5.2 (95% CI 4.7, 5.8)       | 5.2 (95% CI 4.7, 5.8)         |
| <b>Missing (N,%)</b>                    | 4                                                    | 9                             | 4                                   | 4                                     | 138                               |                             |                               |
| <b>Stillbirth</b>                       | 70/1859 (3.8%)                                       | 96/1855 (5.2%)                | 128 (6.9%)                          | 38 (2.0%)                             | 2845 (2.4%)                       | 2.8, (95% CI 2.4, 3.4)      | 2.8 (95% CI 2.3, 3.3)         |
| <b>Missing (N,%)</b>                    | 0                                                    | 4                             | 4                                   | 0                                     | 18                                |                             |                               |

1  
2  
3  
4  
5 \*adjusted for maternal age, gravida and educational attainment and maternal HIV status  
6  
7  
8  
9  
10  
11  
12  
13  
14  
15  
16  
17  
18  
19  
20  
21

## 22 Discussion

23  
24  
25 We performed the first published analysis of the prevalence and outcomes of twin births in  
26  
27  
28 Botswana using nationally representative data from 2014-2019. Because of the absence of  
29  
30  
31 medically assisted reproduction, Botswana represents a particularly valuable opportunity to study  
32  
33  
34 naturally occurring rates and outcomes of twinning. We found that twin births occurred in 16 per  
35  
36  
37 1000 pregnancies, a prevalence much higher than reported twinning rates in LMIC outside of  
38  
39  
40 sub-Saharan Africa. We also found that adverse birth outcomes were high among twin  
41  
42  
43 pregnancies, including a 6.9% stillbirth prevalence, almost 3-fold higher than stillbirths in  
44  
45  
46  
47  
48 singleton pregnancies (2.4%).  
49  
50  
51  
52  
53  
54  
55  
56  
57  
58  
59  
60

1  
2  
3  
4 The rate of twinning in our study, 16/1000 pregnancies, is consistent with previously reported  
5  
6  
7 high rates of naturally occurring twins in Southern Africa (12-15/1000 pregnancies in Namibia,  
8  
9  
10 South Africa, and Lesotho and 15-18/1000 pregnancies in Zimbabwe) [10]. In contrast, very low  
11  
12  
13 twinning rates (6-9/1000 pregnancies) have been documented in LMIC across East Asia and  
14  
15  
16 Central and South America [10]. Geographical differences in naturally occurring twin birth rates  
17  
18  
19 are primarily due to genetic, racial, and ethnic differences in predisposition to dizygotic (DZ)  
20  
21  
22 twin birth [10]. While the rate of twinning in Botswana is high compared to other LMIC, it is  
23  
24  
25 lower than that in many high-income countries (HIC), where the introduction of medically  
26  
27  
28 assisted reproduction has led to dramatic increases in twinning rates over the past several  
29  
30  
31 decades. In the United States, for example, the rate of twin births rose from 18.9 per 1000 births  
32  
33  
34 in 1980 to 33.9 per 1000 births in 2014 [20, 21].  
35  
36  
37  
38  
39  
40  
41  
42  
43

44 The prevalence of stillbirths among twin pregnancies in Botswana (6.9%) is well above the  
45  
46  
47 WHO's target of under 12 stillbirths per 1000 births [22, 23]. However, our prevalence is similar  
48  
49  
50 to that reported across sub-Saharan Africa, and lower than a reported 10.2% stillbirth prevalence  
51  
52  
53 among twins in one Nigerian study [24]. In contrast, the prevalence of stillbirth in twins in  
54  
55  
56  
57  
58  
59  
60

1  
2  
3 Botswana is higher than in high-income countries such as the United States (USA) (0.35%) [25]  
4  
5  
6  
7 and South Korea (0.48%) [26]. The prevalence of stillbirth among singletons in our study is  
8  
9  
10 2.4%, which is nearly 10 times greater than that among singletons in many high-income  
11  
12  
13 countries [27, 28]. While twin pregnancies are clearly particularly high-risk and contribute  
14  
15  
16 substantially to perinatal mortality, the high prevalence of stillbirths among all pregnancies in  
17  
18  
19 Botswana highlights a strong need for interventions to decrease stillbirths in the entire  
20  
21  
22  
23  
24  
25  
26  
27  
28  
29  
30  
31  
32  
33  
34  
35  
36  
37  
38  
39  
40  
41  
42  
43  
44  
45  
46  
47  
48  
49  
50  
51  
52  
53  
54  
55  
56  
57  
58  
59  
60

The prevalence of preterm birth among twin pregnancies (46.%) in Botswana is substantially  
higher than that among singleton pregnancies (16.8%) and slightly higher than reported  
prevalence of preterm birth among twins in other sub-Saharan countries [24]. However,  
prevalence of preterm birth with twin pregnancy in Botswana is lower than the United States,  
where 60% of twin pregnancies have preterm births [6, 28]. While the high prevalence of  
preterm births among twins in the US may be partially attributed to the increased risk for preterm  
birth in multiple gestation, it may also be explained by clearer antenatal care guidelines and  
closer prenatal monitoring among twin pregnancies in the US compared to Botswana. The high

1  
2  
3 prevalence of preterm birth among twins in the US is in line with the American College of  
4  
5  
6  
7 Obstetrics and Gynecology's guidelines, which recommend timing delivery based on  
8  
9  
10 chorionicity (38 weeks for dichorionic-diamniotic, 34-36 6/7 weeks for monochorionic-  
11  
12  
13 diamniotic, 32-34 for monochorionic-monoamniotic) and delivery by 37-38 week's gestation in  
14  
15  
16  
17 uncomplicated twin pregnancies to reduce the risk of stillbirth [29-32].  
18  
19  
20  
21  
22  
23

24 The relatively low rate of preterm birth and high rate of stillbirth among twin pregnancies in  
25  
26  
27 Botswana raises the question of whether twin stillbirths in Botswana could be decreased by  
28  
29  
30 increasing delivery of high-risk (monochorionic-monoamniotic, monochorionic-diamniotic) twin  
31  
32  
33 pregnancies between 34 and 37 weeks [31-33]. To implement this type of change, improvements  
34  
35  
36  
37 in proportion of ultrasound in the first trimester of twin pregnancy to identify chorionicity and to  
38  
39  
40 improve accuracy of gestational age dating would be needed. Additionally, preterm delivery may  
41  
42  
43  
44 carry increased risk in low resource settings like Botswana where intensive neonatal care  
45  
46  
47 services are limited. Though delivery by 37 weeks may not be appropriate in all settings, closer  
48  
49  
50 surveillance of twin pregnancies after 34 weeks GA, at which time the risk of stillbirth and  
51  
52  
53  
54 maternal complications begins to rise, may improve twin outcomes in Botswana [26]. Close  
55  
56  
57  
58  
59  
60



1  
2  
3 monitoring for fetal growth concordance [34], screening for aneuploidy, which is more common  
4  
5  
6 among twin pregnancies and associated with higher risk of stillbirth [35, 36], and clear delivery  
7  
8  
9  
10 planning during antenatal care may also help to reduce adverse perinatal outcomes among twins.

11  
12  
13 In addition to increased antenatal care, improvements in maternal nutrition may help improve  
14  
15  
16 outcomes in twin pregnancies in Botswana. Despite the relatively lower prevalence of preterm  
17  
18  
19 births in Botswana, we found very high rates of LBW and VLBW among twins (77.2% and  
20  
21  
22 16.8%, respectively, compared to 55.6% and 9.1% in the USA) [7], which is likely  
23  
24  
25  
26 multifactorial, but suggests that women with twin pregnancies in Botswana may not receive  
27  
28  
29 adequate nutrition to support multiple gestations [37, 38].  
30  
31  
32  
33  
34  
35  
36

37 Strengths of this study include the large, nationally representative sample with little missing data.  
38

39  
40 Our study also has several limitations. Due to the limited availability of early prenatal  
41  
42  
43 ultrasound, gestational age may be less accurate. Also, our study did not collect information  
44  
45  
46 necessary to determine the etiology of preterm delivery and stillbirth among twins, such as  
47  
48  
49 induction status, spontaneity of preterm delivery, whether c-sections were planned or emergent,  
50  
51  
52 indication for c-section (including presentation of infants), or fetal heartbeat on admission.  
53  
54  
55  
56  
57  
58  
59  
60

1  
2  
3  
4 Understanding the causes of adverse outcomes is clearly necessary before effective interventions  
5  
6  
7 can be designed and implemented. However, we hope our findings will be the catalyst for further  
8  
9  
10 research to elucidate these causes and ultimately lead to fewer adverse birth outcomes among  
11  
12  
13 twins. We are also unable to distinguish the proportion of twins that are monochorionic (MC),  
14  
15  
16 which is a known risk factor for stillbirth and neonatal death [9, 33]. However, the prevalence of  
17  
18  
19 MC twins is thought to be relatively constant worldwide (prevalence of DZ twins varies), so this  
20  
21  
22 is unlikely to explain the high prevalence of stillbirth that we found among twin pregnancies in  
23  
24  
25 Botswana [39, 40]. Due to our study design, we are unable to evaluate the impact of preterm and  
26  
27  
28 low birthweight on longer-term outcomes of twins, or estimate perinatal mortality. Finally, we do  
29  
30  
31 not have data from deliveries occurring outside the hospital, though this is rare (<5%) in  
32  
33  
34 Botswana [15, 16].  
35  
36  
37  
38  
39  
40  
41  
42  
43

#### 44 **Conclusions**

45  
46  
47 In summary, we found that the prevalence of twinning is high in Botswana and adverse birth  
48  
49  
50 outcomes are common among twin pregnancies and are often severe. The high rate of stillborn  
51  
52  
53 and LBW twins despite a relatively low preterm birthrate compared to twins in high-income  
54  
55  
56  
57  
58  
59  
60

1  
2  
3 countries points to the need for interventions that include early ultrasound and identification of  
4  
5  
6  
7 twin gestation and type of twin gestation, improved maternal nutrition, close antepartum  
8  
9  
10 surveillance, and advanced delivery planning in order to reduce morbidity and mortality among  
11  
12  
13 twin pregnancies in Botswana.  
14  
15

#### 16 17 18 19 20 Abbreviations

21 GA: Gestational Age

22 RR: Relative Risk

23 aRR: Adjusted Relative Risk

24 IQR: Inter-Quartile Range

25 LMIC: Low- and Middle-Income Countries

26 HIC: High-Income Countries

27 LBW: Low Birthweight

28 VLBW: Very Low Birthweight

29 HIV: Human Immunodeficiency Virus

30 MZ: monozygotic

31 DZ: dizygotic

32 MC: monochorionic

33 DC: dichorionic  
34  
35  
36  
37  
38  
39  
40  
41  
42  
43  
44  
45

#### 46 Competing Interests

47  
48 The authors declare that they have no competing interests.  
49  
50  
51  
52

#### 53 Funding: 54 55 56 57 58 59 60

1  
2  
3  
4 Supported by grants from the Eunice Kennedy Shriver National Institute of Child Health and  
5 Human Development (NICHD), National Institutes of Health (R01 HD080471 and R01  
6 HD095766, to Dr. Shapiro; and K23 HD088230, to Dr. Zash).  
7  
8  
9  
10

#### 11 Data Availability

12  
13  
14 Per Botswana IRB regulations, de-identified data from the Tsepamo study can be requested from  
15 the Principal Investigator of the Study.  
16  
17  
18  
19

#### 20 Authors' contributions

21  
22  
23 AI and RZ designed and performed the analysis and drafted the initial manuscript. RLS, JM,  
24 MM, RZ, DJ contributed to the design, data collection and study oversight of the parent study.  
25 GM, MD, JM, SD, AI oversaw data collection and data cleaning. All authors (AI, MD, GM, JM,  
26 SD, MM, JM, DJ, RL, RLS, RZ) contributed substantive feedback, revised and approved the  
27 final manuscript.  
28  
29  
30  
31  
32

#### 33 Acknowledgements

34 We thank our research assistants Cynthia Dube, Daphne Segobye, Gosego Legase, Keemenao  
35 France, Mmapula Ofhentse, Naledi Kamanga, Onkabetse Mokgosi, Rosemary Moremi, Shally  
36 Morgan, Tsaone Gaonakala, Tshepang Motlotlegi, Edith Moseki, Patricia Mophutegi, Keba  
37 Rabasiako, Nametsang Tshosa, Maipelo Kegakilwe, Masego Kgafela, Tshegofato Motladile,  
38 Tsholofelo Tsokunyane, Kealeboga Mmokele, Obakeng Makalane, Thuto Rabana, Seele  
39 Mafokate, Annah Bojang, Tlhabologo Baitsemi, Priscilla Mashona, and Bathoba Mabiletsa; the  
40 maternity staff and administrators at the 18 participating hospitals; the members of the Botswana  
41 Ministry of Health and Wellness and the Department of Maternal and Child Health.  
42  
43  
44  
45  
46  
47  
48  
49

#### 50 Ethics Statement

51 Not Applicable  
52  
53

#### 54 References

55  
56  
57  
58  
59  
60

1. Hanson C, Munjanja S, Binagwaho A, Vwalika B, Pembe AB, Jacinto E, et al. National policies and care provision in pregnancy and childbirth for twins in Eastern and Southern Africa: A mixed- methods multi-country study. *PLoS Med.* 2019;16(2).
2. Lawn J, Mongi P, Cousens S. Africa's newborns—counting them and making them count. In: Lawn J, Kerber K, editors. *Opportunities for Africa's Newborns: Practical data, policy and programmatic support for newborn care in Africa.* Cape Town: PMNCH; 2006. p. 11-22.
3. Bellizzi S, Sobel H, Betran AP, Temmerman M. Early neonatal mortality in twin pregnancy: Findings from 60 low-and middle-income countries. *J Glob Health.* 2018;8(1).
4. Peter C, Wenzlaff P, Kruempelmann J, Alzen G, Bueltmann E, Gruessner SE. Perinatal morbidity and early neonatal mortality in twin pregnancies. *Open J Obstet Gynecol.* 2013;3(1):78-89.
5. Hack KE, Derks JB, Elias SG, Franx A, Roos EJ, Voerman SK, et al. Increased perinatal mortality and morbidity in monochorionic versus dichorionic twin pregnancies: clinical implications of a large Dutch cohort study. *BJOG.* 2007;115(1):58-67.
6. Murray SR, Stock JS, Cowan S, Elizabeth SC, Norman JE. Spontaneous preterm birth prevention in multiple pregnancy. *Obstet Gynaecol.* 2018;20(1):57-63.
7. Martin JA, Hamilton BE, Osterman MJ, Driscoll AK. *Births: Final Data for 2018.* National Vital Statistics Report, vol 68, no 13. Hyattsville, MD: National Center for Health Statistics; 2019. 47 p.
8. Christensen K, Bjerregaard-Anderson M. Twin-singleton early-life survival in sub-Saharan Africa. *Lancet Glob Health.* 2017;5(7):e636-7.
9. Glinianaia SV, Obeyesekera MA, Sturgiss S, Bell R. Stillbirth and neonatal mortality in monochorionic and dichorionic twins: a population-based study. *Hum Reprod.* 2011;26(9):2549-57.
10. Smits J, Monden C. Twinning across the Developing World. *PLoS One.* 2011;6(9).
11. Monden CW, Smits J. Mortality among twins and singletons in sub-Saharan Africa between 1995 and 2014: a pooled analysis of data from 90 Demographic and Health Surveys in 30 countries. *Lancet Glob Health.* 2017;5:e673-9.

12. Justesen A, Kunst A. Postneonatal and child mortality among twins in Southern and Eastern Africa. *Int J Epidemiol*. 2000;29(4):678-83.
13. Miyahara R, Jasseh M, Mackenzie GA, Bottomley C, Hossain MJ, Greenwood BM, et al. The large contribution of twins to neonatal and post-neonatal mortality in The Gambia, a 5-year prospective study. *BMC Pediatr*. 2016;16.
14. Mogobe KD, Tshiamo W, Bowelo M. Monitoring Maternity Mortality in Botswana. *Reprod Health Matters*. 2007;15(30):163-71.
15. Madzimbamuto FD, Ray SC, Mogobe KD, Ramogola-Masire D, Phillips R, Haverkamp M, et al. A root-cause analysis of maternal deaths in Botswana: towards developing a culture of patient safety and quality improvement. *BMC Pregnancy Childbirth*. 2014;14.
16. Nkhwaluma L, Mashalla Y. Maternal mortality trends at the Princess Marina and Nyangabwe referral hospitals in Botswana. *Afr Health Sci*. 2019;19(2):1833-40.
17. Zash R, Jacobson DL, Diseko M, Mayondi G, Mmalane M, Essex M, et al. Comparative Safety of Antiretroviral Treatment Regimens in Pregnancy. *JAMA Pediatr*. 2017;171(10).
18. Zash R, Holmes L, Diseko M, Jacobson DL, Brummel S, Mayondi G, et al. Neural-Tube Defects and Antiretroviral Treatment Regimens in Botswana. *New Engl J Med*. 2019;381:827-40.
19. Zash R, Jacobson DL, Diseko M, Mayondi G, Mmalane M, Essex M, et al. Comparative safety of dolutegravir-based or efavirenz-based antiretroviral treatment started during pregnancy in Botswana: an observational study. *Lancet Glob Health*. 2018;6:e804-10.
20. Martin JA, Hamilton BE, Osterman MJ. Three Decades of Births in the United States, 1980-2009. Hyattsville, MD: National Center for Health Statistics; 2012. 8 p. Report No.: 80.
21. Martin JA, Osterman MJ. Is Twin Childbearing on the Decline? Twin Births in the United States, Hyattsville, MD: National Center for Health Statistics; 2019. 8 p. Report No.: 351.
22. Saleem S, Tikmani SS, McClure EM, Moore JL, Azam SI, Dhaded SM. Trends and determinants of stillbirth in developing countries: results from the Global Network's Population-Based Birth Registry. *Reprod Health*. 2018;15(Suppl 1).
23. Lawn JE, Blencowe H, Waiswa P, Amouzou A, Mathers C, Hogan D. Stillbirths: rates, risk factors, and acceleration towards 2030. *Lancet*. 2016;387:587-603.

- 1  
2  
3  
4 24. Akaba GO, Agida TE, Onafowokan O, Offiong RA, Adewole ND. Review of Twin  
5 Pregnancies in a Tertiary Hospital in Abuja, Nigeria. *J Health Popul Nutr.*  
6 2013;31(2):272-7.  
7
- 8  
9 25. Page JM, Pilliod RA, Snowden JM, Caughey AB. The risk of stillbirth and infant death  
10 by each additional week of expectant management in twin pregnancies. *Am J Obstet*  
11 *Gynecol.* 2015;212(5):630.e1-7.  
12
- 13  
14 26. Ko HS, Choi SK, Wie JH, Park IY, Park YG, Shin JC. Optimal Timing of Delivery  
15 Based on the Risk of Stillbirth and Infant Death Associated with Each Additional Week  
16 of Expectant Management in Multiple Pregnancies: a National Cohort Study of Koreans.  
17 *J Korean Med Sci.* 2018;33(10).  
18
- 19  
20 27. Flenady V, Wojcieszek AM, Middleton P, Ellwood D, Erwich JJ, Coory M. Stillbirths:  
21 recall to action in high-income countries. *Lancet.* 2016;387:691-702.  
22
- 23  
24 28. MacDorman MF, Gregory EC. Fetal and Perinatal Mortality: United States, 2013.  
25 *National Vital Statistics Report.* 2015;64(8).  
26
- 27  
28 29. Committee on Practice Bulletins—Obstetrics; Society for Maternal-Fetal Medicine.  
29 Practice Bulletin No. 169: Multifetal Gestations: Twin, Triplet, and Higher-Order  
30 Multifetal Pregnancies. *Obstet Gynecol.* 2016;128(4):e131-46.  
31
- 32  
33 30. Dodd JM, Crowther CA, Haslam RR, Robinson SJ. Timing of birth for women with a  
34 twin pregnancy at term: a randomized controlled trial. *BMC Pregnancy Childbirth.*  
35 2010;10.  
36
- 37  
38 31. Dodd JM, Crowther CA, Haslam RR, Robinson SJ. Elective birth at 37 weeks of  
39 gestation versus standard care for women with an uncomplicated twin pregnancy at term:  
40 the Twins Timing of Birth Randomised Trial. *BJOG.* 2012;119(8):964-74.  
41
- 42  
43 32. Wood S, Tang S, Ross S, Sauve R. Stillbirth in twins, exploring the optimal gestational  
44 age for delivery: a retrospective cohort study. *BJOG.* 2014;121(10):1284-93.  
45
- 46  
47 33. Cheong-See F, Schuit E, Arroyo-Manzano D, Khalil A, Barrett J, Joseph KS, et al.  
48 Prospective risk of stillbirth and neonatal complications in twin pregnancies: systematic  
49 review and meta-analysis. *BMJ.* 2016;354.  
50
- 51  
52 34. D'Antonio F, Odibo AO, Prefumo F, Khalil A, Buca D, Flacco ME, et al. Weight  
53 Discordance and Perinatal Mortality in Twin Pregnancy: Systemic Review and Meta-  
54 Analysis. *Ultrasound Obstet Gynecol.* 2017;52(1):11-23.  
55  
56  
57  
58  
59  
60

- 1  
2  
3  
4 35. Shi K, Li L, Huang X, Chen B, Zhou Y, Fang Q. Fetal Aneuploidy: A Comparison of  
5 Dichorionic Twins and Monochorionic Twins. *Fetal Diagn Ther*. 2018;44:124-8.  
6  
7 36. Audibert F, Gagnon A. No. 262-Prenatal Screening for and Diagnosis of Aneuploidy in  
8 Twin Pregnancies. *J Obstet Gynaecol Can*. 2017;93(9):e347-61.  
9  
10 37. Luke B. Nutrition in Multiple Gestations. *Clin Perinatol*. 2005;32:403-29.  
11  
12 38. Goodnight W, Newman R. Optimal Nutrition for Improved Twin Pregnancy Outcome.  
13 *Obstet Gynecol*. 2009;114(5):1121-34.  
14  
15 39. Pison G, D'Addato AV. Frequency of Twin Births in Developed Countries. *Twin Res*  
16 *Hum Genet*. 2006;9(2):250-9.  
17  
18 40. Hankins GV, Saade GR. Factors influencing twins and zygosity. *Paediatr Perinat*  
19 *Epidemiol*. 2005;19(Suppl 1):8-9.  
20  
21  
22  
23  
24  
25  
26  
27  
28  
29  
30  
31  
32  
33  
34  
35  
36  
37  
38  
39  
40  
41  
42  
43  
44  
45  
46  
47  
48  
49  
50  
51  
52  
53  
54  
55  
56  
57  
58  
59  
60



STROBE Statement—Checklist of items that should be included in reports of *cross-sectional studies*

|                              | Item No | Recommendation                                                                                                                                                                                               | Page No |
|------------------------------|---------|--------------------------------------------------------------------------------------------------------------------------------------------------------------------------------------------------------------|---------|
| <b>Title and abstract</b>    | 1       | (a) Indicate the study's design with a commonly used term in the title or the abstract                                                                                                                       | 1       |
|                              |         | (b) Provide in the abstract an informative and balanced summary of what was done and what was found                                                                                                          | 2       |
| <b>Introduction</b>          |         |                                                                                                                                                                                                              |         |
| Background/rationale         | 2       | Explain the scientific background and rationale for the investigation being reported                                                                                                                         | 3       |
| Objectives                   | 3       | State specific objectives, including any prespecified hypotheses                                                                                                                                             | 4       |
| <b>Methods</b>               |         |                                                                                                                                                                                                              |         |
| Study design                 | 4       | Present key elements of study design early in the paper                                                                                                                                                      | 4       |
| Setting                      | 5       | Describe the setting, locations, and relevant dates, including periods of recruitment, exposure, follow-up, and data collection                                                                              | 5       |
| Participants                 | 6       | (a) Give the eligibility criteria, and the sources and methods of selection of participants                                                                                                                  | 5       |
| Variables                    | 7       | Clearly define all outcomes, exposures, predictors, potential confounders, and effect modifiers. Give diagnostic criteria, if applicable                                                                     | 5       |
| Data sources/<br>measurement | 8*      | For each variable of interest, give sources of data and details of methods of assessment (measurement). Describe comparability of assessment methods if there is more than one group                         | 5       |
| Bias                         | 9       | Describe any efforts to address potential sources of bias                                                                                                                                                    | 5,      |
| Study size                   | 10      | Explain how the study size was arrived at                                                                                                                                                                    | 4, 5    |
| Quantitative variables       | 11      | Explain how quantitative variables were handled in the analyses. If applicable, describe which groupings were chosen and why                                                                                 | 6       |
| Statistical methods          | 12      | (a) Describe all statistical methods, including those used to control for confounding                                                                                                                        | 6       |
|                              |         | (b) Describe any methods used to examine subgroups and interactions                                                                                                                                          | 6       |
|                              |         | (c) Explain how missing data were addressed                                                                                                                                                                  | 6       |
|                              |         | (d) If applicable, describe analytical methods taking account of sampling strategy                                                                                                                           | 6       |
|                              |         | (e) Describe any sensitivity analyses                                                                                                                                                                        | 6       |
| <b>Results</b>               |         |                                                                                                                                                                                                              |         |
| Participants                 | 13*     | (a) Report numbers of individuals at each stage of study—eg numbers potentially eligible, examined for eligibility, confirmed eligible, included in the study, completing follow-up, and analysed            | 7       |
|                              |         | (b) Give reasons for non-participation at each stage                                                                                                                                                         | n/a     |
|                              |         | (c) Consider use of a flow diagram                                                                                                                                                                           | n/a     |
| Descriptive data             | 14*     | (a) Give characteristics of study participants (eg demographic, clinical, social) and information on exposures and potential confounders                                                                     | 9       |
|                              |         | (b) Indicate number of participants with missing data for each variable of interest                                                                                                                          | 10      |
| Outcome data                 | 15*     | Report numbers of outcome events or summary measures                                                                                                                                                         | 10      |
| Main results                 | 16      | (a) Give unadjusted estimates and, if applicable, confounder-adjusted estimates and their precision (eg, 95% confidence interval). Make clear which confounders were adjusted for and why they were included | 8, 10   |

|                          |    |                                                                                                                                                                            |        |
|--------------------------|----|----------------------------------------------------------------------------------------------------------------------------------------------------------------------------|--------|
|                          |    | (b) Report category boundaries when continuous variables were categorized                                                                                                  | 5      |
|                          |    | (c) If relevant, consider translating estimates of relative risk into absolute risk for a meaningful time period                                                           | n/a    |
| Other analyses           | 17 | Report other analyses done—eg analyses of subgroups and interactions, and sensitivity analyses                                                                             | 9, 10  |
| <b>Discussion</b>        |    |                                                                                                                                                                            |        |
| Key results              | 18 | Summarise key results with reference to study objectives                                                                                                                   | 11     |
| Limitations              | 19 | Discuss limitations of the study, taking into account sources of potential bias or imprecision. Discuss both direction and magnitude of any potential bias                 | 14     |
| Interpretation           | 20 | Give a cautious overall interpretation of results considering objectives, limitations, multiplicity of analyses, results from similar studies, and other relevant evidence | 13, 14 |
| Generalisability         | 21 | Discuss the generalisability (external validity) of the study results                                                                                                      | 12-14  |
| <b>Other information</b> |    |                                                                                                                                                                            |        |
| Funding                  | 22 | Give the source of funding and the role of the funders for the present study and, if applicable, for the original study on which the present article is based              | 15     |

\*Give information separately for exposed and unexposed groups.

**Note:** An Explanation and Elaboration article discusses each checklist item and gives methodological background and published examples of transparent reporting. The STROBE checklist is best used in conjunction with this article (freely available on the Web sites of PLoS Medicine at <http://www.plosmedicine.org/>, Annals of Internal Medicine at <http://www.annals.org/>, and Epidemiology at <http://www.epidem.com/>). Information on the STROBE Initiative is available at [www.strobe-statement.org](http://www.strobe-statement.org).
